# Supplementary material for: Antibody profiling of patients with prostate cancer reveals differences in antibody signatures among disease stages
Source: PubMed Central journal article supplement — J Immunother Cancer. 2020 Dec 16;8(2):e001510. doi: 10.1136/jitc-2020-001510 (PMC7745697; doi:10.1136/jitc-2020-001510), 2020-12-16
Supplement: jitc-2020-001510supp001.pdf [file jitc-2020-001510supp001.pdf]

Vaccine-Increased

| Seq ID                | Unigene ID | Uniprot ID | Gene Names                              |
|-----------------------|------------|------------|-----------------------------------------|
| 1_HSPA1A_3303         | Hs.274402  | P0DMV8     | HSPA1A HSP72 HSPA1 HSX70                |
| 100_AKAP17A_8227      | Hs.522572  | Q02040     | AKAP17A CXYorf3 DXYS155E SFRS17A XE7    |
| 1000_H2AFY_9555       | Hs.420272  | O75367     | H2AFY MACROH2A1                         |
| 1001_ITPK1_3705       | Hs.308122  | Q13572     | ITPK1                                   |
| 1002_PTPN11_5781      | Hs.506852  | Q06124     | PTPN11 PTP2C SHPTP2                     |
| 1003_EIF3J_8669       | Hs.404056  | O75822     | EIF3J EIF3S1 PRO0391                    |
| 1004_TRIP12_9320      | Hs.591633  | Q14669     | TRIP12 KIAA0045 ULF                     |
| 1006_YEATS2_55689     | Hs.632575  | Q9ULM3     | YEATS2 KIAA1197                         |
| 1007_SEL1L3_23231     | Hs.479384  | Q68CR1     | SEL1L3 KIAA0746                         |
| 1008_IDH1_3417        | Hs.593422  | O75874     | IDH1 PICD                               |
| 101_HSPH1_10808       | Hs.36927   | Q92598     | HSPH1 HSP105 HSP110 KIAA0201            |
| 1010_LDLR_3949        | Hs.213289  | P01130     | LDLR                                    |
| 1011_FAM129B_64855    | Hs.522401  | Q96TA1     | NIBAN2 C9orf88 FAM129B                  |
| 1012_MAP3K5_4217      | Hs.186486  | Q99683     | MAP3K5 ASK1 MAPKKK5 MEKK5               |
| 1013_NEFH_4744        | Hs.198760  | P12036     | NEFH KIAA0845 NFH                       |
| 1014_RAP1B_5908       | Hs.369920  | P61224     | RAP1B OK/SW-cl.11                       |
| 1015_MCCC1_56922      | Hs.47649   | Q96RQ3     | MCCC1 MCCA                              |
| 1017_MT1E_4493        | Hs.534330  | P04732     | MT1E                                    |
| 1022_TXNDC5_81567     | Hs.150837  | Q8NBS9     | TXNDC5 TLP46 UNQ364/PRO700              |
| 1023_STRA13_201254    | Hs.37616   | O14503     | BHLHE40 BHLHB2 DEC1 SHARP2 STRA13       |
| 1024_NPEPPS_9520      | Hs.443837  | P55786     | NPEPPS PSA                              |
| 1025_YIPF6_286451     | Hs.82719   | Q96EC8     | YIPF6                                   |
| 1026_CLIP1_6249       | Hs.524809  | P30622     | CLIP1 CYLN1 RSN                         |
| 1027_SRSF7_6432       | Hs.309090  | Q16629     | SRSF7 SFRS7                             |
| 103_RPS25_6230        | Hs.512676  | P62851     | RPS25                                   |
| 1031_SOCS7_30837      | Hs.514132  | O14512     | SOCS7 NAP4 SOCS6                        |
| 1032_C1orf9_51430     | Hs.626306  | Q9UBS9     | SUCO C1orf9 CH1 OPT SLP1                |
| 1034_OCIAD2_132299    | Hs.95835   | Q56VL3     | OCIAD2                                  |
| 1035_RAB35_11021      | Hs.524788  | Q15286     | RAB35 RAB1C RAY                         |
| 1036_WWC1_23286       | Hs.484047  | Q8IX03     | WWC1 KIAA0869                           |
| 1037_SUZ12_23512      | Hs.730786  | Q15022     | SUZ12 CHET9 JJAZ1 KIAA0160              |
| 1038_ZNHIT1_10467     | Hs.211079  | O43257     | ZNHIT1 CGBP1 ZNFN4A1                    |
| 1039_ABAT_18          | Hs.336768  | P80404     | ABAT GABAT                              |
| 104_RPL23_9349        | Hs.406300  | P62829     | RPL23                                   |
| 1040_DIAPH1_1729      | Hs.529451  | O60610     | DIAPH1 DIAP1                            |
| 1041_MLL_4297         | Hs.258855  | Q03164     | KMT2A ALL1 CXXC7 HRX HTRX MLL MLL1 TRX1 |
| 1043_LEPROT_54741     | Hs.23581   | O15243     | LEPROT LEPR OBR                         |
| 1044_ZFP36L2_678      | Hs.503093  | P47974     | ZFP36L2 BRP2 ERF2 RNF162C TIS11D        |
| 1045_STRBP_55342      | Hs.694157  | Q96SI9     | STRBP SPNR                              |
| 1046_SRRT_51593       | Hs.111801  | Q9BXP5     | SRRT ARS2 ASR2                          |
| 1048_TSPYL4_23270     | Hs.284141  | Q9UJ04     | TSPYL4 KIAA0721                         |
| 1049_ABLIM1_3983      | Hs.438236  | O14639     | ABLIM1 ABLIM KIAA0059 LIMAB1            |
| 105_HIST2H2AA4_723790 | Hs.731339  | Q6FI13     | HIST2H2AA3 H2AFO HIST2H2AA; HIST2H2AA4  |
| 1051_TRA2B_6434       | Hs.533122  | P62995     | TRA2B SFRS10                            |
| 1052_ARL6IP4_51329    | Hs.103561  | Q66PJ3     | ARL6IP4                                 |
| 1055_KIAA0146_23514   | Hs.381058  | Q14159     | SPIDR KIAA0146                          |
| 1056_KIAA0355_9710    | Hs.330073  | O15063     | KIAA0355                                |
| 1057_SRRM1_10250      | Hs.18192   | Q8IYB3     | SRRM1 SRM160                            |

|                     |           |        |                                      |
|---------------------|-----------|--------|--------------------------------------|
| 1058_SLC25A3_5250   | Hs.144130 | Q00325 | SLC25A3 PHC OK/SW-cl.48              |
| 1059_NEMF_9147      | Hs.655964 | O60524 | NEMF SDCCAG1                         |
| 1060_CNP_1267       | Hs.8752   | P23582 | NPPC CNP2                            |
| 1062_BCLAF1_9774    | Hs.486542 | Q9NYF8 | BCLAF1 BTF KIAA0164                  |
| 1063_ITGAV_3685     | Hs.436873 | P06756 | ITGAV MSK8 VNRA VTNR                 |
| 1066_PDPK1_5170     | Hs.459691 | O15530 | PDPK1 PDK1                           |
| 1069_PTRH2_51651    | Hs.12677  | Q9Y3E5 | PTRH2 BIT1 PTH2 CGI-147              |
| 107_RPS27_6232      | Hs.546291 | P42677 | RPS27 MPS1                           |
| 1070_MGST1_4257     | Hs.389700 | P10620 | MGST1 GST12 MGST                     |
| 1071_NRBP2_340371   | Hs.521926 | Q9NSY0 | NRBP2 PP9320 TRG16                   |
| 1073_GLTSCR1_29998  | Hs.97244  | Q9NZM4 | BICRA GLTSCR1                        |
| 1074_LTA4H_4048     | Hs.524648 | P09960 | LTA4H LTA4                           |
| 1075_WIPI2_26100    | Hs.122363 | Q9Y4P8 | WIPI2 CGI-50                         |
| 1076_TANC1_85461    | Hs.61590  | Q9C0D5 | TANC1 KIAA1728                       |
| 1077_NPM1_4869      | Hs.557550 | P06748 | NPM1 NPM                             |
| 1079_IST1_9798      | Hs.46423  | P53990 | IST1 KIAA0174                        |
| 1081_DDX3Y_8653     | Hs.99120  | O15523 | DDX3Y DBY                            |
| 1083_LAMC1_3915     | Hs.609663 | P11047 | LAMC1 LAMB2                          |
| 1084_RAB10_10890    | Hs.467960 | P61026 | RAB10                                |
| 1085_FAM117B_150864 | Hs.471130 | Q6P1L5 | FAM117B ALS2CR13                     |
| 1086_RBPJ_3516      | Hs.479396 | Q06330 | RBPJ IGKJRB IGKJRB1 RBPJK RBPSUH     |
| 1088_PPIA_5478      | Hs.356331 | P62937 | PPIA CYP A                           |
| 1090_TSPYL5_85453   | Hs.173094 | Q86VY4 | TSPYL5 KIAA1750                      |
| 1091_RBBP6_5930     |           | Q7Z6E9 | RBBP6 P2PR PACT RBQ1 My038           |
| 1093_EIF1AX_1964    | Hs.522590 | P47813 | EIF1AX EIF1A EIF4C                   |
| 1094_IMPA1_3612     | Hs.656694 | P29218 | IMPA1 IMPA                           |
| 1096_ANKHD1_54882   | Hs.594084 | Q8IWZ3 | ANKHD1 KIAA1085 MASK VBARP PP2500    |
| 1097_CDC28A_25901   | Hs.412019 | Q8IWP9 | CCDC28A C6orf80                      |
| 1098_ARGLU1_55082   | Hs.508644 | Q9NWB6 | ARGLU1                               |
| 110_AMD1_262        | Hs.159118 | P17707 | AMD1 AMD                             |
| 1100_KIAA0494_9813  | Hs.592859 | O75071 | EFCAB14 KIAA0494                     |
| 1102_BRD1_23774     | Hs.127950 | O95696 | BRD1 BRL BRPF2                       |
| 1103_USO1_8615      | Hs.292689 | O60763 | USO1 VDP                             |
| 1104_CHMP3_51652    | Hs.591582 | Q9Y3E7 | CHMP3 CGI149 NEDF VPS24 CGI-149      |
| 1105_SGK1_6446      | Hs.510078 | O00141 | SGK1 SGK                             |
| 1106_SLC22A23_63027 | Hs.713588 | A1A5C7 | SLC22A23 C6orf85                     |
| 1107_ACAT1_38       | Hs.232375 | P35610 | SOAT1 AACT AACT1 ACAT ACAT1 SOAT STA |
| 1108_CUX1_1523      | Hs.191482 | P39880 | CUX1 CUTL1                           |
| 111_GDF15_9518      | Hs.616962 | Q99988 | GDF15 MIC1 PDF PLAB PTGFB            |
| 1112_TGOLN2_10618   | Hs.593382 | O43493 | TGOLN2 TGN46 TGN51                   |
| 1113_PTPLB_201562   | Hs.705480 | Q6Y1H2 | HACD2 PTPLB                          |
| 1114_STAG3L1_54441  | Hs.632310 | P0CL83 | STAG3L1                              |
| 1115_ZNF350_59348   | Hs.407694 | Q9GZX5 | ZNF350 ZBRK1                         |
| 1116_CDKN1C_1028    | Hs.106070 | P49918 | CDKN1C KIP2                          |
| 112_RPL19_6143      | Hs.381061 | P84098 | RPL19                                |
| 1120_LAPTM4B_55353  | Hs.492314 | Q86VI4 | LAPTM4B PSEC0001                     |
| 1121_RPL22L1_200916 | Hs.380933 | Q6P5R6 | RPL22L1                              |
| 1122_NFIL3_4783     | Hs.79334  | Q16649 | NFIL3 E4BP4 IL3BP1                   |
| 1123_H2AFV_94239    | Hs.488189 | Q71UI9 | H2AFV H2AV                           |
| 1125_IGF2_3481      | Hs.272259 | P01344 | IGF2 PP1446                          |

|                       |           |        |                                           |
|-----------------------|-----------|--------|-------------------------------------------|
| 1128_C5orf15_56951    | Hs.730670 | Q8NC54 | KCT2 C5orf15 HTGN29                       |
| 1129_EZH2_2146        | Hs.444082 | Q15910 | EZH2 KMT6                                 |
| 113_LOC648771_648771  |           |        |                                           |
| 1132_SH3RF1_57630     | Hs.301804 | Q7Z6J0 | SH3RF1 KIAA1494 POSH POSH1 RNF142 SH3M    |
| 1133_SMARCA1_6594     | Hs.152292 | P28370 | SMARCA1 SNF2L SNF2L1                      |
| 1135_ARMC2_84071      | Hs.645481 | Q8NENO | ARMC2                                     |
| 1137_KAT6A_7994       | Hs.491577 | Q92794 | KAT6A MOZ MYST3 RUNXBP2 ZNF220            |
| 1138_SNRNP200_23020   | Hs.246112 | O75643 | SNRNP200 ASCC3L1 HELIC2 KIAA0788          |
| 1139_NDUFA2_4695      | Hs.534333 | O43678 | NDUFA2                                    |
| 114_SRRM2_23524       | Hs.433343 | Q9UQ35 | SRRM2 KIAA0324 SRL300 SRM300 HSPC075      |
| 1141_EIF4A3_9775      | Hs.389649 | P38919 | EIF4A3 DDX48 KIAA0111                     |
| 1142_NOP56_10528      | Hs.376064 | O00567 | NOP56 NOL5A                               |
| 1143_PHF2_5253        | Hs.211441 | O75151 | PHF2 CENP-35 KIAA0662                     |
| 1145_PRR15L_79170     | Hs.368260 | Q9BU68 | PRR15L ATAD4                              |
| 1147_PPA1_5464        | Hs.437403 | Q15181 | PPA1 IOPPP PP                             |
| 1149_ARF3_377         |           | P61204 | ARF3                                      |
| 115_HMG2N2_3151       | Hs.181163 | P05204 | HMG2N2 HMG17                              |
| 1152_HIST1H4L_8368    | Hs.533295 | P62805 | H4C1 H4/A H4FA HIST1H4A; H4C2 H4/I H4FI H |
| 1154_CAMLG_819        | Hs.529846 | P49069 | CAMLG CAML                                |
| 1155_EIF5_1983        | Hs.433702 | P55010 | EIF5                                      |
| 1156_PREPL_9581       | Hs.727511 | Q4J6C6 | PREPL KIAA0436                            |
| 1157_KRAS_3845        | Hs.505033 | P01116 | KRAS KRAS2 RASK2                          |
| 1158_SEMA4C_54910     | Hs.516220 | Q9C0C4 | SEMA4C KIAA1739 SEMAI UNQ5855/PRO344E     |
| 1159_PIP4K2B_8396     | Hs.730609 | P78356 | PIP4K2B PIP5K2B                           |
| 116_TRIB1_10221       | Hs.444947 | Q96RU8 | TRIB1 C8FW GIG2 TRB1                      |
| 1160_CYFIP1_23191     | Hs.26704  | Q7L576 | CYFIP1 KIAA0068                           |
| 1161_LINC00116_205251 | Hs.128499 | Q8NCU8 | MTLN LINC00116 NCRNA00116 SMIM37          |
| 1162_LIMS1_3987       | Hs.597715 | P48059 | LIMS1 PINCH PINCH1                        |
| 1163_CARS2_79587      | Hs.508725 | Q9HA77 | CARS2 OK/SW-cl.10                         |
| 1164_PTSS1_9791       | Hs.292579 | P48651 | PTSS1 KIAA0024 PSSA                       |
| 1167_BZW2_28969       | Hs.487635 | Q9Y6E2 | BZW2 HSPC028 MSTP017                      |
| 1168_MT1X_4501        | Hs.374950 | P80297 | MT1X                                      |
| 1169_ILF2_3608        | Hs.75117  | Q12905 | ILF2 NF45 PRO3063                         |
| 117_DHX9_1660         | Hs.191518 | Q08211 | DHX9 DDX9 LKP NDH2                        |
| 1171_SF3B1_23451      | Hs.632554 | O75533 | SF3B1 SAP155                              |
| 1173_ATP1B1_481       | Hs.291196 | P05026 | ATP1B1 ATP1B                              |
| 1178_C12orf51_283450  | Hs.530943 | Q9Y4D8 | HECTD4 C12orf51 KIAA0614                  |
| 1179_CXXC5_51523      | Hs.189119 | Q7LFL8 | CXXC5 HSPC195 TCCCIA00297                 |
| 118_RPS7_6201         | Hs.546287 | P62081 | RPS7                                      |
| 1180_ATP8B2_57198     | Hs.435700 | P98198 | ATP8B2 ATPID KIAA1137                     |
| 1182_PHF10_55274      | Hs.435933 | Q8WUB8 | PHF10 BAF45A                              |
| 1183_MDK_4192         | Hs.82045  | P21741 | MDK MK1 NEGF2                             |
| 1184_RIPK4_54101      | Hs.517310 | P57078 | RIPK4 ANKRD3 DIK                          |
| 1185_ST6GAL1_6480     | Hs.207459 | P15907 | ST6GAL1 SIAT1                             |
| 1186_WDR1_9948        | Hs.128548 | O75083 | WDR1                                      |
| 1187_TDP2_51567       | Hs.403010 | O95551 | TDP2 EAP2 TTRAP AD-022                    |
| 1188_RIC8A_60626      | Hs.592292 | Q9NPQ8 | RIC8A                                     |
| 1189_HDAC1_3065       | Hs.26593  | Q13547 | HDAC1 RPD3L1                              |
| 119_RPS10_6204        | Hs.645317 | P46783 | RPS10                                     |
| 1190_HIST1H2AG_8969   | Hs.51011  | P0C0S8 | H2AC11 H2AFP HIST1H2AG; H2AC13 H2AFC HI   |

|                      |           |        |                                          |
|----------------------|-----------|--------|------------------------------------------|
| 1191_JUND_3727       |           | P17535 | JUND                                     |
| 1192_CNKSR3_154043   | Hs.16064  | Q6P9H4 | CNKSR3 MAGI1                             |
| 1193_HIST1H2BH_8345  | Hs.247815 | Q93079 | HIST1H2BH H2BFJ                          |
| 1194_ANXA1_301       | Hs.494173 | P04083 | ANXA1 ANX1 LPC1                          |
| 1196_ZFP62_643836    | Hs.509227 | Q8NB50 | ZFP62                                    |
| 1197_GNAQ_2776       | Hs.269782 | P50148 | GNAQ GAQ                                 |
| 1199_PRKAR2A_5576    | Hs.631923 | P13861 | PRKAR2A PKR2 PRKAR2                      |
| 12_HSP90AA1_3320     | Hs.525600 | P07900 | HSP90AA1 HSP90A HSPC1 HSPCA              |
| 120_NPIPL3_23117     | Hs.632865 | Q92617 | NPIPB3 KIAA0220 NPIPL3                   |
| 1200_C11orf96_387763 | Hs.714890 | Q7Z7L8 | C11orf96 AG2                             |
| 1201_UIMC1_51720     | Hs.232721 | Q96RL1 | UIMC1 RAP80 RXRIP110                     |
| 1202_CTNNA1_1495     | Hs.445981 | P35221 | CTNNA1                                   |
| 1203_SRSF1_6426      | Hs.68714  | Q07955 | SRSF1 ASF SF2 SF2P33 SFRS1 OK/SW-cl.3    |
| 1204_TAF15_8148      | Hs.402752 | Q16514 | TAF12 TAF15 TAF2J TAFII20                |
| 1205_HIST1H2AH_85235 | Hs.352225 | Q96KK5 | HIST1H2AH HIST1H2AI                      |
| 1207_PAFAH1B1_5048   | Hs.77318  | P43034 | PAFAH1B1 LIS1 MDCR MDS PAFAHA            |
| 1208_SCFD1_23256     | Hs.369168 | Q8WVM8 | SCFD1 C14orf163 KIAA0917 STXBP1L2 FKSG23 |
| 1209_DDX1_1653       | Hs.440599 | Q92499 | DDX1                                     |
| 121_OGT_8473         | Hs.405410 | O15294 | OGT                                      |
| 1210_SYBU_55638      | Hs.390738 | Q9NX95 | SYBU GOLSYN KIAA1472                     |
| 1211_OCRL_4952       | Hs.126357 | Q01968 | OCRL OCRL1                               |
| 1212_PCF11_51585     | Hs.128959 | O94913 | PCF11 KIAA0824                           |
| 1215_ING5_84289      | Hs.529172 | Q8WYH8 | ING5                                     |
| 1216_UBE2I_7329      | Hs.302903 | P63279 | UBE2I UBC9 UBCE9                         |
| 1218_CNOT2_4848      | Hs.730666 | Q9NZN8 | CNOT2 CDC36 NOT2 HSPC131 MSTP046         |
| 1220_PKP3_11187      | Hs.534395 | Q9Y446 | PKP3                                     |
| 1222_SMARCC2_6601    | Hs.236030 | Q8TAQ2 | SMARCC2 BAF170                           |
| 1223_EIF3M_10480     | Hs.502244 | Q7L2H7 | EIF3M HFLB5 PCID1 GA17 PNAS-125          |
| 1224_RABGAP1_23637   | Hs.271341 | Q9Y3P9 | RABGAP1 HSPC094                          |
| 1225_RNF114_55905    | Hs.144949 | Q9Y508 | RNF114 ZNF228 ZNF313                     |
| 1226_PITPNA_5306     | Hs.429819 | Q00169 | PITPNA PITPN                             |
| 1227_HRASLS5_117245  | Hs.410316 | Q96KN8 | PLAAT5 HRASLS5 HRLP5                     |
| 123_NEDD4L_23327     | Hs.185677 | Q96PU5 | NEDD4L KIAA0439 NEDL3                    |
| 1230_MBOAT2_129642   | Hs.467634 | Q6ZWT7 | MBOAT2 OACT2                             |
| 1231_FAM49B_51571    | Hs.126941 | Q9NUQ9 | FAM49B BM-009                            |
| 1233_SUB1_10923      | Hs.229641 | P53999 | SUB1 PC4 RPO2TC1                         |
| 1234_MRPL33_9553     | Hs.515879 | O75394 | MRPL33 C2orf1                            |
| 1235_VAMP8_8673      | Hs.714302 | Q9BV40 | VAMP8                                    |
| 1236_KLHDC10_23008   | Hs.520710 | Q6PID8 | KLHDC10 KIAA0265                         |
| 1238_IFITM1_8519     | Hs.458414 | P13164 | IFITM1 CD225 IFI17                       |
| 1240_NOP10_55505     | Hs.14317  | Q9NPE3 | NOP10 NOLA3                              |
| 1242_THOC2_57187     | Hs.149991 | Q8NI27 | THOC2 CXorf3                             |
| 1243_DUSP16_80824    | Hs.536535 | Q9BY84 | DUSP16 KIAA1700 MKP7                     |
| 1244_ETFB_2109       | Hs.348531 | P38117 | ETFB FP585                               |
| 1246_TAF1C_9013      | Hs.153022 | Q15572 | TAF1C                                    |
| 1247_CRYL1_51084     | Hs.370703 | Q9Y2S2 | CRYL1 CRY                                |
| 1248_DHTKD1_55526    | Hs.104980 | Q96HY7 | DHTKD1 KIAA1630                          |
| 1249_ALDH1A3_220     | Hs.459538 | P47895 | ALDH1A3 ALDH6                            |
| 125_RPS27A_6233      | Hs.546292 | P62979 | RPS27A UBA80 UBCEP1                      |
| 1250_MRPS35_60488    | Hs.311072 | P82673 | MRPS35 MRPS28 HDCMD11P MDS023 PSEC02     |

|                      |           |        |                                           |
|----------------------|-----------|--------|-------------------------------------------|
| 1251_SNX12_29934     | Hs.260750 | Q9UMY4 | SNX12                                     |
| 1252_SMG1_23049      | Hs.460179 | Q96Q15 | SMG1 ATX KIAA0421 LIP                     |
| 1253_ANKRD11_29123   | Hs.335003 | Q6UB99 | ANKRD11 ANCO1                             |
| 1254_C19orf50_79036  | Hs.369785 | Q9BQD3 | KXD1 C19orf50                             |
| 1256_C19orf28_126321 | Hs.656901 | Q6NUT3 | MFSD12 C19orf28                           |
| 1257_PMVK_10654      | Hs.30954  | Q15126 | PMVK PMKI                                 |
| 1258_SRSF10_10772    | Hs.3530   | O75494 | SRSF10 FUSIP1 FUSIP2 SFRS13A TASR         |
| 1259_HPS4_89781      | Hs.474436 | Q9NQG7 | HPS4 KIAA1667                             |
| 126_ND4_4538         | Hs.465808 | P03905 | MT-ND4 MTND4 NADH4 ND4                    |
| 1260_C1orf63_57035   | Hs.259412 | Q9BUV0 | RSRP1 C1orf63 HT033 NPD014                |
| 1261_PIGT_51604      | Hs.437388 | Q969N2 | PIGT CGI-06 PSEC0163 UNQ716/PRO1379       |
| 1262_HSF1_3297       | Hs.530227 | Q00613 | HSF1 HSTF1                                |
| 1263_FBXO25_26260    | Hs.438454 | Q8TCJ0 | FBXO25 FBX25                              |
| 1264_CAST_831        | Hs.436186 | P20810 | CAST                                      |
| 1267_PPAPDC1B_84513  | Hs.567619 | Q8NEB5 | PLPP5 DPPL1 HTPAP PPAPDC1B                |
| 1268_XYLT2_64132     | Hs.463416 | Q9H1B5 | XYLT2 XT2 UNQ3058/PRO9878                 |
| 1270_EIF2AK1_27102   | Hs.728827 | Q9BQI3 | EIF2AK1 HRI KIAA1369 PRO1362              |
| 1272_GTPBP4_23560    | Hs.215766 | Q9BZE4 | GTPBP4 CRFG NOG1                          |
| 1273_NFIA_4774       | Hs.191911 | Q12857 | NFIA KIAA1439                             |
| 1275_SNRPB2_6629     | Hs.280378 | P08579 | SNRPB2                                    |
| 1277_FABP5_2171      | Hs.408061 | Q01469 | FABP5                                     |
| 1279_MFN2_9927       | Hs.376681 | O95140 | MFN2 CPRP1 KIAA0214                       |
| 128_RPL35A_6165      | Hs.529631 | P18077 | RPL35A GIG33                              |
| 1280_FZD4_8322       | Hs.591968 | Q9ULV1 | FZD4                                      |
| 1281_SNRPE_6635      | Hs.334612 | P62304 | SNRPE                                     |
| 1282_RARS_5917       | Hs.654907 | P54136 | RARS                                      |
| 1283_TCEAL3_85012    | Hs.311776 | Q969E4 | TCEAL3 MSTP072                            |
| 1284_MGP_4256        | Hs.365706 | P08493 | MGP MGLAP GIG36                           |
| 1285_MICAL2_9645     | Hs.501928 | O94851 | MICAL2 KIAA0750 MICAL2PV1 MICAL2PV2       |
| 1286_BCL6_604        | Hs.478588 | P41182 | BCL6 BCL5 LAZ3 ZBTB27 ZNF51               |
| 1287_MYO6_4646       | Hs.149387 | Q9UM54 | MYO6 KIAA0389                             |
| 1289_MSH6_2956       | Hs.445052 | P52701 | MSH6 GTBP                                 |
| 1292_RAN_5901        | Hs.194718 | P62826 | RAN ARA24 OK/SW-cl.81                     |
| 1293_AMACR_23600     | Hs.508343 | Q9UHK6 | AMACR                                     |
| 1294_CAPRIN1_4076    | Hs.471818 | Q14444 | CAPRIN1 GPIAP1 GPIP137 M11S1 RNG105       |
| 1296_EXOC7_23265     | Hs.514496 | Q9UPT5 | EXOC7 EXO70 KIAA1067                      |
| 1297_NRD1_4898       | Hs.584782 | O43847 | NRDC NRD1                                 |
| 1298_MYO19_80179     | Hs.302051 | Q96H55 | MYO19 MYOHD1                              |
| 1299_SYPL1_6856      | Hs.80919  | Q16563 | SYPL1 SYPL                                |
| 13_H3F3A_3020        | Hs.533624 | P84243 | H3-3A H3.3A H3F3 H3F3A PP781; H3-3B H3.3E |
| 1303_RUFY1_80230     | Hs.306769 | Q96T51 | RUFY1 RABIP4 ZFYVE12                      |
| 1305_PSM1_5707       | Hs.3887   | Q99460 | PSM1                                      |
| 1306_SLC38A1_81539   | Hs.533770 | Q9H2H9 | SLC38A1 ATA1 NAT2 SAT1 SNAT1              |
| 1307_TSG101_7251     | Hs.523512 | Q99816 | TSG101                                    |
| 1309_RAB3IP_117177   | Hs.258209 | Q96QF0 | RAB3IP RABIN8                             |
| 131_POM121_9883      | Hs.655217 | Q96HA1 | POM121 KIAA0618 NUP121 POM121A            |
| 1310_TADA3_10474     | Hs.386390 | O75528 | TADA3 ADA3 TADA3L                         |
| 1311_TBC1D14_57533   | Hs.518611 | Q9P2M4 | TBC1D14 KIAA1322                          |
| 1312_TAB2_23118      | Hs.269775 | Q9NYJ8 | TAB2 KIAA0733 MAP3K7IP2                   |
| 1314_RCN1_5954       | Hs.97887  | Q15293 | RCN1 RCN                                  |

|                     |           |        |                                         |
|---------------------|-----------|--------|-----------------------------------------|
| 1316_DNAJB1_3337    | Hs.515210 | P25685 | DNAJB1 DNAJ1 HDJ1 HSPF1                 |
| 1317_MYC_4609       | Hs.202453 | P01106 | MYC BHLHE39                             |
| 1318_GANAB_23193    | Hs.595071 | Q14697 | GANAB G2AN KIAA0088                     |
| 1319_ARL6IP5_10550  | Hs.730695 | O75915 | ARL6IP5 DERP11 JWA PRA2 PRAF3 HSPC127   |
| 132_RPL21_6144      | Hs.381123 | P46778 | RPL21                                   |
| 1320_FARSB_10056    | Hs.471452 | Q9NSD9 | FARSB FARSLB FRFB HSPC173               |
| 1321_MLLT4_4301     | Hs.614974 | P55196 | AFDN AF6 MLLT4                          |
| 1322_NIT2_56954     | Hs.439152 | Q9NQR4 | NIT2 CUA002                             |
| 1324_KIAA1430_57587 | Hs.535734 | Q9P2B7 | CFAP97 KIAA1430                         |
| 1325_KIAA1324_57535 | Hs.708190 | Q6UXG2 | KIAA1324 EIG121 UNQ2426/PRO4985         |
| 1326_PPP1CC_5501    | Hs.79081  | P36873 | PPP1CC                                  |
| 1327_SELENBP1_8991  | Hs.632460 | Q13228 | SELENBP1 SBP                            |
| 1328_MT1L_4500      | Hs.647358 | Q93083 | MT1L                                    |
| 1330_PDIA4_9601     | Hs.93659  | P13667 | PDIA4 ERP70 ERP72                       |
| 1332_IP6K2_51447    | Hs.595983 | Q9UHH9 | IP6K2 IHPK2 TCCCIA00113                 |
| 1333_TMCO3_55002    | Hs.317593 | Q6UWJ1 | TMCO3 C13orf11 UNQ2419/PRO4976          |
| 1334_HGSNAT_138050  | Hs.600384 | Q68CP4 | HGSNAT TMEM76                           |
| 1335_KTN1_3895      | Hs.509414 | Q86UP2 | KTN1 CG1 KIAA0004                       |
| 1337_SIDT2_51092    | Hs.712144 | Q8NB9J | SIDT2 CGI-40 PSEC0072 UNQ685/PRO1325    |
| 1338_TOP1MT_116447  | Hs.528574 | Q969P6 | TOP1MT                                  |
| 1339_RNASET2_8635   | Hs.529989 | O00584 | RNASET2 RNASE6PL                        |
| 134_CD99_4267       | Hs.522805 | P14209 | CD99 MIC2 MIC2X MIC2Y                   |
| 1343_DAAM1_23002    | Hs.654934 | Q9Y4D1 | DAAM1 KIAA0666                          |
| 1344_SEC31A_22872   | Hs.370024 | O94979 | SEC31A KIAA0905 SEC31L1 HSPC275 HSPC334 |
| 1345_ENOSF1_55556   | Hs.369762 | Q7L5Y1 | ENOSF1 RTS TYMSAS                       |
| 1348_ARFIP1_27236   | Hs.416089 | P53367 | ARFIP1                                  |
| 1349_NMT1_4836      | Hs.532790 | P30419 | NMT1 NMT                                |
| 1350_MDH1_4190      | Hs.526521 | P40925 | MDH1 MDHA                               |
| 1353_LAS1L_81887    | Hs.522675 | Q9Y4W2 | LAS1L MSTP060                           |
| 1354_SET_6418       | Hs.436687 | Q9NQR1 | KMT5A PRSET7 SET07 SET8 SETD8           |
| 1355_SIVA1_10572    | Hs.112058 | O15304 | SIVA1 SIVA                              |
| 1356_MT1H_4496      | Hs.438462 | P80294 | MT1H                                    |
| 1357_BZW1_9689      | Hs.355983 | Q7L1Q6 | BZW1 BZAP45 KIAA0005                    |
| 1358_TOM1L2_146691  | Hs.462379 | Q6ZVM7 | TOM1L2                                  |
| 1359_SP3_6670       | Hs.531587 | Q02447 | SP3                                     |
| 136_RPL17_6139      | Hs.374588 | P18621 | RPL17                                   |
| 1360_DCAF13_25879   | Hs.532265 | Q9NV06 | DCAF13 WDSOF1 HSPC064                   |
| 1361_IARS_3376      | Hs.445403 | P41252 | IARS                                    |
| 1362_ADD1_118       | Hs.183706 | P35611 | ADD1 ADDA                               |
| 1363_LEF1_51176     | Hs.555947 | Q9UJU2 | LEF1                                    |
| 1367_KIF13B_23303   | Hs.444767 | Q9NQT8 | KIF13B GAKIN KIAA0639                   |
| 1368_VEZF1_7716     | Hs.463569 | Q14119 | VEZF1 DB1 ZNF161                        |
| 1369_JUNB_3726      | Hs.25292  | P17275 | JUNB                                    |
| 137_RPL14_9045      | Hs.730621 | P50914 | RPL14                                   |
| 1370_GOLPH3_64083   | Hs.408909 | Q9H4A6 | GOLPH3 GPP34                            |
| 1373_TPM3_7170      | Hs.644306 | P06753 | TPM3                                    |
| 1374_PSMA6_5687     | Hs.446260 | P60900 | PSMA6 PROS27                            |
| 1375_ARID4B_51742   | Hs.575782 | Q4LE39 | ARID4B BRCAA1 RBBP1L1 RBP1L1 SAP180     |
| 1376_MORF4L2_9643   | Hs.326387 | Q15014 | MORF4L2 KIAA0026 MRGX                   |
| 1377_TRIM2_23321    | Hs.435711 | Q9C040 | TRIM2 KIAA0517 RNF86                    |



|                       |           |        |                                    |
|-----------------------|-----------|--------|------------------------------------|
| 1378_CHD7_55636       | Hs.20395  | Q9P2D1 | CHD7 KIAA1416                      |
| 1379_KPNA4_3840       | Hs.730660 | O00629 | KPNA4 QIP1                         |
| 138_RPL37_6167        | Hs.80545  | P61927 | RPL37                              |
| 1380_PSM3_5709        | Hs.12970  | O43242 | PSM3                               |
| 1382_PGC_5225         | Hs.1867   | Q86YN6 | PPARGC1B PERC PGC1 PGC1B PPARGC1   |
| 1383_SYNCRIP_10492    | Hs.571177 | O60506 | SYNCRIP HNRPQ NSAP1                |
| 1385_ITGB1_3688       | Hs.643813 | P05556 | ITGB1 FNRB MDF2 MSK12              |
| 1386_RALGAPA2_57186   | Hs.472285 | Q2PPJ7 | RALGAPA2 C20orf74 KIAA1272         |
| 1387_RPA1_6117        | Hs.461925 | P27694 | RPA1 REPA1 RPA70                   |
| 139_BBS5_129880       | Hs.233398 | Q8N3I7 | BBS5                               |
| 1390_BEX2_84707       | Hs.398989 | Q9BXY8 | BEX2                               |
| 1391_PDIA5_10954      | Hs.477352 | Q14554 | PDIA5 PDIR                         |
| 1392_C20orf108_116151 | Hs.143736 | Q96KR6 | FAM210B C20orf108 PSEC0265         |
| 1393_PSM7_5695        | Hs.213470 | Q99436 | PSM7 Z                             |
| 1394_PCGF3_10336      | Hs.144309 | Q3KNV8 | PCGF3 RNF3 RNF3A                   |
| 1395_CCT6A_908        | Hs.82916  | P40227 | CCT6A CCT6 CCTZ                    |
| 1396_HIST2H2AB_317772 | Hs.664173 | Q8IUE6 | HIST2H2AB                          |
| 1397_SAR1B_51128      | Hs.432984 | Q9Y6B6 | SAR1B SARA2 SARB                   |
| 1398_BANP_54971       | Hs.461705 | Q8N9N5 | BANP BEND1 SMAR1                   |
| 14_UBOX5_22888        | Hs.654646 | O94941 | UBOX5 KIAA0860 RNF37 UBCE7IP5 UIP5 |
| 1400_FOXJ3_22887      | Hs.26023  | Q9UPW0 | FOXJ3 KIAA1041                     |
| 1402_A2M_2            | Hs.212838 | P01023 | A2M CPAMD5 FWP007                  |
| 1403_HGS_9146         | Hs.730823 | O14964 | HGS HRS                            |
| 1404_DPYSL3_1809      | Hs.519659 | Q14195 | DPYSL3 CRMP4 DRP3 ULIP ULIP1       |
| 1405_ATXN2_6311       | Hs.460499 | Q99700 | ATXN2 ATX2 SCA2 TNRC13             |
| 1407_FXR1_8087        | Hs.478407 | P51114 | FXR1                               |
| 1408_ESRP2_80004      | Hs.592053 | Q9H6T0 | ESRP2 RBM35B PP7059                |
| 1409_MAP2K3_5606      | Hs.514012 | P46734 | MAP2K3 MEK3 MKK3 PRKMK3 SKK2       |
| 141_CAMKK2_10645      | Hs.297343 | Q96RR4 | CAMKK2 CAMKKB KIAA0787             |
| 1411_MAFG_4097        | Hs.252229 | O15525 | MAFG                               |
| 1417_XRN1_54464       | Hs.435103 | Q8IZH2 | XRN1 SEP1                          |
| 1418_YBX1_4904        | Hs.473583 | P67809 | YBX1 NSEP1 YB1                     |
| 1419_TBL1XR1_79718    | Hs.715026 | Q9BZK7 | TBL1XR1 IRA1 TBLR1                 |
| 142_RPL13_6137        | Hs.410817 | P26373 | RPL13 BBC1 OK/SW-cl.46             |
| 1420_TCF3_6929        | Hs.371282 | P15923 | TCF3 BHLHB21 E2A ITF1              |
| 1421_DUSP12_11266     | Hs.416216 | Q9UNI6 | DUSP12                             |
| 1423_CHCHD7_79145     | Hs.436913 | Q9BUK0 | CHCHD7                             |
| 1424_ITPRIPL2_162073  | Hs.530899 | Q3MIP1 | ITPRIPL2                           |
| 1425_SSRP1_6749       | Hs.523680 | Q08945 | SSRP1 FACT80                       |
| 1426_FAM164A_51101    | Hs.271876 | Q96GY0 | ZC2HC1A C8orf70 FAM164A CGI-62     |
| 1427_PFKM_5213        | Hs.75160  | P08237 | PFKM PFKX                          |
| 1428_MRPS14_63931     | Hs.654858 | O60783 | MRPS14                             |
| 1429_FRMD8_83786      | Hs.578433 | Q9BZ67 | FRMD8 FKSG44                       |
| 143_STX16_8675        | Hs.307913 | O14662 | STX16                              |
| 1430_DLD_1738         | Hs.131711 | P09622 | DLD GCSL LAD PHE3                  |
| 1431_ZNF462_58499     | Hs.370379 | Q96JM2 | ZNF462 KIAA1803                    |
| 1433_SASH1_23328      | Hs.193133 | O94885 | SASH1 KIAA0790 PEPE1               |
| 1434_PKN2_5586        | Hs.440833 | Q16513 | PKN2 PRK2 PRKCL2                   |
| 145_IGFBP7_3490       | Hs.479808 | Q16270 | IGFBP7 MAC25 PSF                   |
| 146_SMPD4_55627       | Hs.516450 | Q9NXX4 | SMPD4 KIAA1418 SKNY                |

|                     |           |        |                                     |
|---------------------|-----------|--------|-------------------------------------|
| 147_RPL36_25873     | Hs.432485 | Q9Y3U8 | RPL36                               |
| 149_RPS11_6205      | Hs.433529 | P62280 | RPS11                               |
| 1490_LGALS3_3958    | Hs.531081 | P17931 | LGALS3 MAC2                         |
| 150_YWHAG_7532      | Hs.520974 | P61981 | YWHAG                               |
| 151_ILDR1_286676    | Hs.98484  | Q86SU0 | ILDR1                               |
| 152_FAM162A_26355   | Hs.584881 | Q96A26 | FAM162A C3orf28 E2IG5 DC16 FWP001   |
| 153_C1orf198_84886  | Hs.520494 | Q9H425 | C1orf198                            |
| 155_C11orf75_56935  | Hs.438064 | Q9NRQ5 | SMCO4 C11orf75 FN5                  |
| 156_ARF1_375        | Hs.286221 | P84077 | ARF1                                |
| 157_RPS13_6207      | Hs.446588 | P62277 | RPS13                               |
| 158_NUPR1_26471     | Hs.513463 | O60356 | NUPR1 COM1                          |
| 159_MGST2_4258      | Hs.81874  | Q99735 | MGST2 GST2                          |
| 16_ORAI1_84876      | Hs.55148  | Q96D31 | ORAI1 CRACM1 TMEM142A               |
| 161_CDK2AP1_8099    | Hs.725139 | O14519 | CDK2AP1 CDKAP1 DOC1                 |
| 162_CEBPD_1052      | Hs.440829 | P49716 | CEBPD                               |
| 163_ATP13A3_79572   | Hs.529609 | Q9H7F0 | ATP13A3 AFURS1                      |
| 166_RPS17_6218      | Hs.433427 | P08708 | RPS17 RPS17L                        |
| 167_ATP5E_514       | Hs.177530 | P56381 | ATP5F1E ATP5E                       |
| 168_C16orf53_79447  | Hs.702841 | Q9BTK6 | PAGR1 C16orf53 PA1                  |
| 170_C15orf63_25764  | Hs.730672 | Q9NX55 | HYPK C15orf63 HSPC136               |
| 172_GOLGA6L9_440295 | Hs.630181 | A6NEM1 | GOLGA6L9 GOLGA6L20                  |
| 175_IRF2BP2_359948  | Hs.350268 | Q7Z5L9 | IRF2BP2                             |
| 176_ORC6_23594      | Hs.49760  | Q9Y5N6 | ORC6 ORC6L                          |
| 177_RPL10A_4736     | Hs.546269 | P62906 | RPL10A NEDD6                        |
| 178_ZC3H11A_9877    | Hs.532399 | O75152 | ZC3H11A KIAA0663 ZC3HDC11A          |
| 179_ATF4_468        | Hs.496487 | P18848 | ATF4 CREB2 TXREB                    |
| 18_RPL18_6141       | Hs.515517 | Q07020 | RPL18                               |
| 180_GLTSCR2_29997   | Hs.421907 | Q9NZM5 | NOP53 GLT GLTSCR2 PICT1             |
| 182_PRNP_5621       | Hs.472010 | P04156 | PRNP ALTPRP PRIP PRP                |
| 185_NGFRAP1_27018   | Hs.448588 | Q00994 | BEX3 DXS6984E NADE NGFRAP1          |
| 19_NPIP_9284        | Hs.676266 | Q9UND3 | NPIPA1 NPIP                         |
| 190_ND5_4540        | Hs.723616 | P03915 | MT-ND5 MTND5 NADH5 ND5              |
| 191_CMTM6_54918     | Hs.380627 | Q9NX76 | CMTM6 CKLFSF6                       |
| 195_NDUFB9_4715     | Hs.15977  | Q9Y6M9 | NDUFB9 LYRM3 UQOR22                 |
| 196_HNRNPM_4670     | Hs.465808 | P52272 | HNRNPM HNRPM NAGR1                  |
| 198_ATP9A_10079     | Hs.649234 | O75110 | ATP9A ATP1IA KIAA0611               |
| 199_MAEA_10296      | Hs.139896 | Q7L5Y9 | MAEA EMP HLC10 PIG5                 |
| 2_AR_367            | Hs.634882 | P10275 | AR DHTR NR3C4                       |
| 200_BRI3_25798      | Hs.567438 | Q9NQX7 | ITM2C BRI3 hucep-14 NPD018 PSEC0047 |
| 202_NACA_4666       | Hs.505735 | Q13765 | NACA HSD48                          |
| 203_TMEM87A_25963   | Hs.730697 | Q8NBN3 | TMEM87A PSEC0094                    |
| 207_FAU_2197        | Hs.387208 | P62861 | FAU                                 |
| 208_TBCA_6902       | Hs.291212 | O75347 | TBCA                                |
| 209_RPL41_6171      | Hs.157160 | P62945 | RPL41                               |
| 21_GTF2I_2969       | Hs.647041 | P78347 | GTF2I BAP135 WBSCR6                 |
| 210_POTEG_404785    | Hs.640191 | Q6S5H5 | POTEG A26C2 POTE14                  |
| 211_RPS15_6209      | Hs.370504 | P62841 | RPS15 RIG                           |
| 212_ZRANB2_9406     | Hs.194718 | O95218 | ZRANB2 ZIS ZNF265                   |
| 213_HMG2P46_283651  | Hs.574240 | Q86SG4 | HMG2P46 C15orf21                    |
| 215_ATP6V1G1_9550   | Hs.388654 | O75348 | ATP6V1G1 ATP6G ATP6G1 ATP6J         |



|                   |           |        |                                         |
|-------------------|-----------|--------|-----------------------------------------|
| 216_WDR6_11180    | Hs.654815 | Q9NNW5 | WDR6                                    |
| 218_CHKA_1119     | Hs.77221  | P35790 | CHKA CHK CKI                            |
| 219_RPL36AL_6166  | Hs.444749 | Q969Q0 | RPL36AL                                 |
| 22_EXOC3L2_90332  | Hs.337557 | Q2M3D2 | EXOC3L2 XTP7                            |
| 222_ACSS1_84532   | Hs.529353 | Q9NUB1 | ACSS1 ACAS2L KIAA1846                   |
| 224_RPL23A_6147   | Hs.419463 | P62750 | RPL23A                                  |
| 226_RPS19_6223    | Hs.438429 | P39019 | RPS19                                   |
| 2261_KLK2_3817    |           | P20151 | KLK2                                    |
| 230_RPS26_6231    | Hs.567235 | P62854 | RPS26                                   |
| 231_B4GALT1_2683  | Hs.272011 | P15291 | B4GALT1 GGTB2                           |
| 233_COX7A2_1347   | Hs.70312  | P14406 | COX7A2 COX7AL                           |
| 234_ARPC3_10094   | Hs.524741 | O15145 | ARPC3 ARC21                             |
| 235_ATP2C1_27032  | Hs.584884 | P98194 | ATP2C1 KIAA1347 PMR1L HUSSY-28          |
| 238_CASC3_22794   | Hs.730662 | O15234 | CASC3 MLN51                             |
| 239_DDR1_780      | Hs.631988 | Q08345 | DDR1 CAK EDDR1 NEP NTRK4 PTK3A RTK6 TRK |
| 241_RAB3D_9545    | Hs.655274 | O95716 | RAB3D GOV RAB16                         |
| 242_HMGB2_3148    | Hs.434953 | P26583 | HMGB2 HMG2                              |
| 244_RPL7_6129     | Hs.571841 | P18124 | RPL7                                    |
| 245_HNRNPC_3183   | Hs.508848 | P07910 | HNRNPC HNRPC                            |
| 247_UBA52_7311    | Hs.5308   | P62987 | UBA52 UBCEP2                            |
| 248_OR51E2_81285  | Hs.501758 | Q9H255 | OR51E2 PSGR                             |
| 249_CCDC72_51372  | Hs.356440 | Q9Y2S6 | TMA7 CCDC72 HSPC016 HSPC330             |
| 25_PEBP1_5037     | Hs.433863 | P30086 | PEBP1 PBP PEBP                          |
| 250_KPNB1_3837    | Hs.532793 | Q14974 | KPNB1 NTF97                             |
| 251_COX2_4513     | Hs.197320 | P35354 | PTGS2 COX2                              |
| 255_RANBP2_5903   | Hs.199561 | P49792 | RANBP2 NUP358                           |
| 257_HIST3H3_8290  | Hs.248171 | Q16695 | HIST3H3 H3FT                            |
| 258_C6orf62_81688 | Hs.9676   | Q9GZU0 | C6orf62 XTP12 Nbla00237                 |
| 259_ANAPC11_51529 | Hs.534456 | Q9NYG5 | ANAPC11 HSPC214                         |
| 26_RPL31_6160     | Hs.469473 | P62899 | RPL31                                   |
| 260_EMP2_2013     | Hs.531561 | P54851 | EMP2 XMP                                |
| 261_APLP2_334     | Hs.370247 | Q06481 | APLP2 APPL2                             |
| 262_HSPD1_3329    | Hs.727543 | P10809 | HSPD1 HSP60                             |
| 263_RPL27_6155    | Hs.523463 | P61353 | RPL27                                   |
| 266_UTRN_7402     | Hs.133135 | P46939 | UTRN DMDL DRP1                          |
| 268_ADM_133       | Hs.370510 | Q7Z4H4 | ADM2 AM2                                |
| 27_NBPF15_284565  | Hs.656782 | Q8N660 | NBPF15 NBPF16                           |
| 271_RPS4X_6191    | Hs.118076 | P62701 | RPS4X CCG2 RPS4 SCAR                    |
| 272_HBB_3043      | Hs.523443 | P68871 | HBB                                     |
| 273_MAGED1_9500   | Hs.5258   | Q9Y5V3 | MAGED1 NRAGE PP2250 PRO2292             |
| 274_SNRPD3_6634   | Hs.356549 | P62318 | SNRPD3                                  |
| 275_RPL37A_6168   | Hs.433701 | P61513 | RPL37A                                  |
| 276_TMBIM6_7009   | Hs.730613 | P55061 | TMBIM6 BI1 TEGT                         |
| 278_SSR2_6746     | Hs.74564  | P43308 | SSR2 TRAPB HSD25                        |
| 279_CTDSP2_10106  | Hs.524530 | O14595 | CTDSP2 NIF2 OS4 SCP2                    |
| 28_EEF1D_1936     | Hs.333388 | P29692 | EEF1D EF1D                              |
| 281_RPL29_6159    | Hs.425125 | P47914 | RPL29                                   |
| 283_MZT2B_80097   | Hs.469925 | Q6NZ67 | MZT2B FAM128B MOZART2B                  |
| 284_DSP_1832      | Hs.519873 | P15924 | DSP                                     |
| 286_NFIC_4782     | Hs.170131 | P08651 | NFIC NFI                                |

|                           |           |        |                                    |
|---------------------------|-----------|--------|------------------------------------|
| 287_USMG5_84833           | Hs.500921 | Q96IX5 | ATP5MD DAPIT HCVFTP2 USMG5 PD04912 |
| 288_PUM1_9698             | Hs.281707 | Q14671 | PUM1 KIAA0099 PUMH1                |
| 289_NDUFA8_4702           | Hs.495039 | P51970 | NDUFA8                             |
| 29_HSP90B1_7184           | Hs.192374 | P14625 | HSP90B1 GRP94 TRA1                 |
| 290_BRD2_6046             | Hs.75243  | P25440 | BRD2 KIAA9001 RING3                |
| 291_CTBP2_1488            | Hs.501345 | P56545 | CTBP2                              |
| 292_CSNK1D_1453           | Hs.631725 | P48730 | CSNK1D HCKID                       |
| 293_RPL7A_6130            | Hs.499839 | P62424 | RPL7A SURF-3 SURF3                 |
| 295_ULK1_8408             | Hs.47061  | O75385 | ULK1 KIAA0722                      |
| 296_NDUFS5_4725           | Hs.632385 | O43920 | NDUFS5                             |
| 298_RPL24_6152            | Hs.477028 | P83731 | RPL24                              |
| 30_LOC100132247_100132247 | Hs.720286 |        |                                    |
| 300_GNL3_26354            | Hs.313544 | Q9BVP2 | GNL3 E2IG3 NS                      |
| 302_SRSF3_6428            | Hs.405144 | P84103 | SRSF3 SFRS3 SRP20                  |
| 303_RPL13AP3_645683       | Hs.663461 | Q6NVV1 | RPL13AP3                           |
| 304_ZNF706_51123          | Hs.374485 | Q9Y5V0 | ZNF706 HSPC038 PNAS-113            |
| 305_NFE2L1_4779           | Hs.514284 | Q14494 | NFE2L1 HBZ17 NRF1 TCF11            |
| 306_LBR_3930              | Hs.435166 | Q14739 | LBR                                |
| 309_TMC8_147138           | Hs.592102 | Q8IU68 | TMC8 EVER2 EVIN2                   |
| 31_MAT2A_4144             | Hs.516157 | P31153 | MAT2A AMS2 MATA2                   |
| 310_AKAP1_8165            | Hs.522572 | Q92667 | AKAP1 AKAP149 PRKA1                |
| 315_SOX4_6659             | Hs.643910 | Q06945 | SOX4                               |
| 316_HIST1H1C_3006         | Hs.7644   | P16403 | H1-2 H1F2 HIST1H1C                 |
| 317_RPL13A_23521          | Hs.523185 | P40429 | RPL13A                             |
| 320_MLEC_9761             | Hs.507074 | Q14165 | MLEC KIAA0152                      |
| 321_SSB_6741              | Hs.632535 | P05455 | SSB                                |
| 322_ARF4_378              | Hs.652183 | P18085 | ARF4 ARF2                          |
| 324_CELF1_10658           | Hs.595333 | Q92879 | CELF1 BRUNOL2 CUGBP CUGBP1 NAB50   |
| 327_AP3D1_8943            | Hs.512815 | O14617 | AP3D1 PRO0039                      |
| 328_C14orf2_9556          | Hs.109052 | P56378 | ATP5MPL C14orf2 MP68 PRO1574       |
| 329_FOLH1_2346            | Hs.654487 | Q04609 | FOLH1 FOLH NAALAD1 PSM PSMA GIG27  |
| 33_ANKK1_255239           | Hs.448473 | Q8NFD2 | ANKK1 PKK2 SGK288                  |
| 330_FKBP2_2286            | Hs.227729 | P26885 | FKBP2 FKBP13                       |
| 331_HIST1H2AD_3013        | Hs.679229 | P20671 | H2AC7 H2AFG HIST1H2AD              |
| 332_RPL8_6132             | Hs.178551 | P62917 | RPL8                               |
| 333_HNRNPA3_220988        | Hs.516539 | P51991 | HNRNPA3 HNRPA3                     |
| 334_RALBP1_10928          | Hs.528993 | Q15311 | RALBP1 RLIP1 RLIP76                |
| 336_STEAP1_26872          | Hs.61635  | Q9UHE8 | STEAP1 PRSS24 STEAP                |
| 337_ATP1B3_483            | Hs.477789 | P54709 | ATP1B3                             |
| 339_SEPW1_6415            | Hs.631549 | P63302 | SELENOW SELW SEPW1                 |
| 34_PTPRF_5792             | Hs.272062 | P10586 | PTPRF LAR                          |
| 340_H2AFJ_55766           | Hs.524280 | Q9BTM1 | H2AFJ                              |
| 341_KRTCAP2_200185        | Hs.516671 | Q8N6L1 | KRTCAP2 KCP2                       |
| 343_TARDBP_23435          | Hs.300624 | Q13148 | TARDBP TDP43                       |
| 344_SEPT9_10801           |           | Q9UHD8 | SEPTIN9 KIAA0991 MSF SEPT9         |
| 346_WASH2P_375260         | Hs.459573 | Q6VEQ5 | WASH2P FAM39B                      |
| 347_TDG_6996              | Hs.584809 | Q13569 | TDG                                |
| 349_PARP1_142             | Hs.177766 | P09874 | PARP1 ADPRT PPOL                   |
| 35_MYO1C_4641             | Hs.286226 | Q12965 | MYO1E MYO1C                        |
| 350_RPL28_6158            | Hs.652114 | P46779 | RPL28                              |

|                    |           |        |                                           |
|--------------------|-----------|--------|-------------------------------------------|
| 351_CCT4_10575     | Hs.421509 | P50991 | CCT4 CCTD SRB                             |
| 352_HP1BP3_50809   | Hs.142442 | Q5SSJ5 | HP1BP3                                    |
| 353_GPI_2821       | Hs.466471 | Q9BRB3 | PIGQ GPI1                                 |
| 354_SLC12A7_10723  | Hs.172613 | Q9Y666 | SLC12A7 KCC4                              |
| 355_CYB5R3_1727    | Hs.561064 | P00387 | CYB5R3 DIA1                               |
| 356_DNAJA4_55466   | Hs.513053 | Q8WW22 | DNAJA4                                    |
| 361_EIF1_10209     | Hs.150580 | P41567 | EIF1 SUI1                                 |
| 362_CYP1B1_1545    | Hs.154654 | Q16678 | CYP1B1                                    |
| 363_EEF1B2_1933    | Hs.421608 | P24534 | EEF1B2 EEF1B EF1B                         |
| 364_TCF25_22980    | Hs.415342 | Q9BQ70 | TCF25 KIAA1049 NULP1 FKSG26               |
| 365_SNRNP70_6625   | Hs.467097 | P08621 | SNRNP70 RNPU1Z RPU1 SNRP70 U1AP1          |
| 367_TUBA1B_10376   | Hs.524390 | P68363 | TUBA1B                                    |
| 369_KIAA1244_57221 | Hs.194408 | Q5TH69 | ARFGEF3 BIG3 C6orf92 KIAA1244             |
| 37_RPL34_6164      | Hs.438227 | P49207 | RPL34                                     |
| 370_NACA2_342538   | Hs.591178 | Q9H009 | NACA2 NACAL                               |
| 373_MTCH1_23787    | Hs.485262 | Q9NZJ7 | MTCH1 PSAP CGI-64 UNQ1871/PRO4314         |
| 378_SNRPF_6636     | Hs.105465 | P62306 | SNRPF PBSCF                               |
| 379_ELP2_55250     | Hs.8739   | Q6IA86 | ELP2 STATIP1                              |
| 38_PDLIM5_10611    | Hs.480311 | Q96HC4 | PDLIM5 ENH L9                             |
| 380_HLA-G_3135     | Hs.512152 | P17693 | HLA-G HLA-6.0 HLAG                        |
| 382_UQCR10_29796   | Hs.284292 | Q9UDW1 | UQCR10 UCRC HSPC119                       |
| 383_TBC1D8_11138   | Hs.442657 | Q0IIM8 | TBC1D8B                                   |
| 385_EIF3D_8664     | Hs.55682  | O15371 | EIF3D EIF3S7                              |
| 386_LRRC8A_56262   | Hs.643600 | Q8IWT6 | LRRC8A KIAA1437 LRRC8 SWELL1 UNQ221/PR    |
| 387_RPS3A_6189     | Hs.356572 | P61247 | RPS3A FTE1 MFTL                           |
| 388_SND1_27044     | Hs.122523 | Q7KZF4 | SND1 TDRD11                               |
| 389_RPL6_6128      | Hs.546283 | Q02878 | RPL6 TXREB1                               |
| 390_IGFBP2_3485    | Hs.438102 | P18065 | IGFBP2 BP2 IBP2                           |
| 392_SPARC_6678     | Hs.111779 | P09486 | SPARC ON                                  |
| 394_NDUFA4_4697    | Hs.50098  | O00483 | NDUFA4                                    |
| 398_PDXDC1_23042   | Hs.370781 | Q6P996 | PDXDC1 KIAA0251                           |
| 40_TMPRSS2_7113    | Hs.439309 | O15393 | TMPRSS2 PRSS10                            |
| 400_CKB_1152       | Hs.173724 | P12277 | CKB CKBB                                  |
| 401_RPN1_6184      | Hs.518244 | P04843 | RPN1                                      |
| 404_ELL2_22936     | Hs.192221 | O00472 | ELL2                                      |
| 408_HNRNPK_3190    | Hs.522257 | P61978 | HNRNPK HNRPK                              |
| 409_TPM1_7168      | Hs.133892 | P09493 | TPM1 C15orf13 TMSA                        |
| 41_NKX3-1_4824     | Hs.55999  | Q99801 | NKX3-1 NKX3.1 NKX3A                       |
| 410_C6orf115_58527 | Hs.600861 | Q9P1F3 | ABRACL C6orf115 HSPC280 PRO2013           |
| 412_RPS4Y1_6192    | Hs.282376 | P22090 | RPS4Y1 RPS4Y PRO2646                      |
| 414_DSTN_11034     | Hs.304192 | P60981 | DSTN ACTDP DSN                            |
| 415_EPAS1_2034     | Hs.468410 | Q99814 | EPAS1 BHLHE73 HIF2A MOP2 PASD2            |
| 416_CCDC47_57003   | Hs.202011 | Q96A33 | CCDC47 GK001 MSTP041 PSEC0077             |
| 417_PNISR_25957    | Hs.520287 | Q8TF01 | PNISR C6orf111 SFRS18 SRRP130 HSPC261 HSI |
| 418_ALDH2_217      | Hs.604551 | P05091 | ALDH2 ALDM                                |
| 419_HK2_3099       | Hs.591588 | P52789 | HK2                                       |
| 42_RPL35_11224     | Hs.182825 | P42766 | RPL35                                     |
| 421_DNAJB2_3300    | Hs.77768  | P25686 | DNAJB2 HSI1 HSPF3                         |
| 422_EIF3C_8663     | Hs.567374 | Q99613 | EIF3C EIF3S8                              |
| 427_SURF4_6836     | Hs.512465 | O15260 | SURF4 SURF-4                              |

|                     |           |        |                                        |
|---------------------|-----------|--------|----------------------------------------|
| 428_SPCS2_9789      | Hs.282700 | Q15005 | SPCS2 KIAA0102 SPC25                   |
| 43_PXN_5829         | Hs.446336 | P49023 | PXN                                    |
| 433_CANX_821        | Hs.567968 | P27824 | CANX                                   |
| 435_ZNF24_7572      | Hs.514802 | P17028 | ZNF24 KOX17 ZNF191 ZSCAN3              |
| 437_PRR13_54458     | Hs.426359 | Q9NZ81 | PRR13 TXR1 BM-041                      |
| 438_AHCY_191        | Hs.485365 | P23526 | AHCY SAHH                              |
| 439_TAX1BP1_8887    | Hs.34576  | Q86VP1 | TAX1BP1 T6BP PRO0105                   |
| 440_NOP58_51602     | Hs.471104 | Q9Y2X3 | NOP58 NOL5 NOP5 HSPC120                |
| 441_NSUN5P2_260294  | Hs.510927 | Q63ZY6 | NSUN5P2 NSUN5C WBSCR20B WBSCR20C       |
| 442_PNRC1_10957     | Hs.75969  | Q12796 | PNRC1 PROL2                            |
| 443_BMPR1B_658      | Hs.598475 | O00238 | BMPR1B                                 |
| 444_CBS_875         | Hs.533013 | P35520 | CBS                                    |
| 445_MARCKS_4082     | Hs.519909 | P29966 | MARCKS MACS PRKCSL                     |
| 446_RPL26_6154      | Hs.644794 | P61254 | RPL26                                  |
| 448_GOLGA4_2803     | Hs.344151 | Q13439 | GOLGA4                                 |
| 449_GALNT11_63917   | Hs.647109 | Q8NCW6 | GALNT11                                |
| 45_MKMK2_2872       | Hs.515032 | Q9HBH9 | MKMK2 GPRK7 MNK2                       |
| 450_MRPS18B_28973   | Hs.655329 | Q9Y676 | MRPS18B C6orf14 HSPC183 PTD017         |
| 452_CHSY1_22856     | Hs.110488 | Q86X52 | CHSY1 CHSY CSS1 KIAA0990 UNQ756/PRO148 |
| 453_NCL_4691        | Hs.79110  | P19338 | NCL                                    |
| 457_NEK9_91754      | Hs.730635 | Q8TD19 | NEK9 KIAA1995 NEK8 NERCC               |
| 458_RBM8A_9939      | Hs.591455 | Q9Y5S9 | RBM8A RBM8 HSPC114 MDS014              |
| 459_CLTC_1213       | Hs.491351 | Q00610 | CLTC CLH17 CLTCL2 KIAA0034             |
| 460_NOTCH2_4853     | Hs.487360 | Q04721 | NOTCH2                                 |
| 461_C7orf28B_221960 | Hs.567779 | P86790 | CCZ1B C7orf28B                         |
| 462_EIF3E_3646      | Hs.405590 | P60228 | EIF3E EIF3S6 INT6                      |
| 465_DHCR24_1718     | Hs.498727 | Q15392 | DHCR24 KIAA0018                        |
| 469_ASRGL1_80150    | Hs.535326 | Q7L266 | ASRGL1 ALP CRASH                       |
| 47_ARL6IP1_23204    | Hs.634882 | Q15041 | ARL6IP1 ARL6IP ARMER KIAA0069          |
| 470_SCCPDH_51097    | Hs.498397 | Q8NBX0 | SCCPDH CGI-49                          |
| 473_RPL5_6125       | Hs.532359 | P46777 | RPL5 MSTP030                           |
| 474_RPL18A_6142     | Hs.337766 | Q02543 | RPL18A                                 |
| 475_PDHA1_5160      | Hs.530331 | P08559 | PDHA1 PHE1A                            |
| 476_EIF3H_8667      | Hs.492599 | O15372 | EIF3H EIF3S3                           |
| 477_SRSF5_6430      | Hs.632326 | Q13243 | SRSF5 HRS SFRS5 SRP40                  |
| 478_VDAC1_7416      | Hs.519320 | P21796 | VDAC1 VDAC                             |
| 48_RPS6_6194        | Hs.408073 | P62753 | RPS6 OK/SW-cl.2                        |
| 481_ATP5O_539       | Hs.409140 | P48047 | ATP5PO ATP5O ATPO                      |
| 483_EML4_27436      | Hs.730709 | Q9HC35 | EML4 C2orf2 EMAPL4                     |
| 485_TSPAN1_10103    | Hs.38972  | O60635 | TSPAN1                                 |
| 486_SRPR_6734       | Hs.368376 | P08240 | SRPRA SRPR                             |
| 487_CTSF_8722       | Hs.11590  | Q9UBX1 | CTSF                                   |
| 488_MYL12B_103910   | Hs.464472 | O14950 | MYL12B MRLC2 MYLC2B                    |
| 489_MTMR4_9110      | Hs.514373 | Q9NYA4 | MTMR4 KIAA0647 ZFYVE11                 |
| 49_U2AF1_7307       | Hs.365116 | Q8WU68 | U2AF1L4 U2AF1-RS3 U2AF1L3              |
| 490_ABCC5_10057     | Hs.728765 | O15440 | ABCC5 MRP5                             |
| 491_KDEL2_11014     | Hs.654552 | P33947 | KDEL2 ERD2.2                           |
| 493_HOXB13_10481    | Hs.66731  | Q92826 | HOXB13                                 |
| 494_MT2A_4502       | Hs.647371 | P02795 | MT2A CES1 MT2                          |
| 499_TCEAL4_79921    | Hs.194329 | Q96E15 | TCEAL4 NPD017                          |

|                        |           |        |                                           |
|------------------------|-----------|--------|-------------------------------------------|
| 500_F11R_50848         | Hs.517293 | Q9Y624 | F11R JAM1 JCAM UNQ264/PRO301              |
| 502_NBPF10_100132406   | Hs.714127 | Q6P3W6 | NBPF10                                    |
| 503_KIF5C_3800         | Hs.660699 | O60282 | KIF5C KIAA0531 NKHC2                      |
| 504_IER2_9592          | Hs.501629 | Q9BTL4 | IER2 ETR101 PIP92                         |
| 506_SPOCK1_6695        | Hs.596136 | Q08629 | SPOCK1 SPOCK TIC1 TICN1                   |
| 507_H1F0_3005          | Hs.226117 | P07305 | H1-0 H1F0 H1FV                            |
| 509_PILRB_29990        | Hs.632314 | Q9UKJ0 | PILRB FDFACT PP1551                       |
| 51_SLC45A3_85414       | Hs.278695 | Q96JT2 | SLC45A3 PCANAP6 PRST                      |
| 511_SLC25A5_292        | Hs.632282 | P05141 | SLC25A5 ANT2                              |
| 512_HIST1H2BK_85236    | Hs.437275 | O60814 | H2BC12 H2BFT HIRIP1 HIST1H2BK             |
| 513_ZMIZ1_57178        | Hs.193118 | Q9ULJ6 | ZMIZ1 KIAA1224 RAI17 ZIMP10               |
| 514_NR2F2_7026         | Hs.347991 | P24468 | NR2F2 ARP1 TFCOUP2                        |
| 515_ACO2_50            | Hs.643610 | Q99798 | ACO2                                      |
| 516_TACSTD2_4070       | Hs.23582  | P09758 | TACSTD2 GA733-1 M1S1 TROP2                |
| 517_NME3_4832          | Hs.514065 | Q13232 | NME3                                      |
| 519_NBPF11_200030      | Hs.515947 | Q86T75 | NBPF11 NBPF24                             |
| 52_RPS20_6224          | Hs.8102   | P60866 | RPS20                                     |
| 520_PTGES3_10728       | Hs.50425  | Q15185 | PTGES3 P23 TEBP                           |
| 521_YTHDF2_51441       | Hs.532286 | Q9Y5A9 | YTHDF2 HGRG8                              |
| 523_TRMT5_57570        | Hs.380159 | Q32P41 | TRMT5 KIAA1393 TRM5                       |
| 524_ACAA1_30           | Hs.643487 | P09110 | ACAA1 ACAA PTHIO                          |
| 525_TAF7_6879          | Hs.438838 | Q15545 | TAF7 TAF2F TAFII55                        |
| 526_PDIA3_2923         | Hs.591095 | P30101 | PDIA3 ERP57 ERP60 GRP58                   |
| 527_PALM2-AKAP2_445815 | Hs.591908 | B1ALY0 | PALM2AKAP2                                |
| 53_PABPC1_26986        | Hs.387804 | P11940 | PABPC1 PAB1 PABP1 PABPC2                  |
| 531_SMARCA4_6597       | Hs.327527 | P51532 | SMARCA4 BAF190A BRG1 SNF2B SNF2L4         |
| 532_ACTN1_87           | Hs.356285 | P12814 | ACTN1                                     |
| 534_MRPS24_64951       | Hs.284286 | Q96EL2 | MRPS24 HSPC335                            |
| 535_MKRN1_23608        | Hs.728819 | Q9UHC7 | MKRN1 RNF61                               |
| 536_MANF_7873          | Hs.436446 | P55145 | MANF ARMET ARP                            |
| 537_DGKD_8527          | Hs.471675 | Q16760 | DGKD KIAA0145                             |
| 538_THRAP3_9967        | Hs.160211 | Q9Y2W1 | THRAP3 BCLAF2 TRAP150                     |
| 539_MAML1_9794         | Hs.631951 | Q92585 | MAML1 KIAA0200                            |
| 54_P4HB_5034           | Hs.464336 | P07237 | P4HB ERBA2L PDI PDIA1 PO4DB               |
| 540_CSTB_1476          | Hs.695    | P04080 | CSTB CST6 STFB                            |
| 543_RHOU_58480         | Hs.647774 | Q7L0Q8 | RHOU ARHU CDC42L1 G28K WRCH1 SB128        |
| 544_MGST3_4259         | Hs.191734 | O14880 | MGST3                                     |
| 545_MGEA5_10724        | Hs.500842 | O60502 | OGA HEXC KIAA0679 MEA5 MGEA5              |
| 547_MTA1_9112          | Hs.525629 | Q13330 | MTA1                                      |
| 548_SCYL1_57410        | Hs.238839 | Q96KG9 | SCYL1 CVAK90 GKLP NTKL TAPK TEIF TRAP HTC |
| 549_REPIN1_29803       | Hs.647086 | Q9BWE0 | REPIN1 RIP60 ZNF464                       |
| 551_GNG10_2790         | Hs.534196 | P50151 | GNG10 GNGT10                              |
| 552_ADAR_103           | Hs.12341  | P55265 | ADAR ADAR1 DSRAD G1P1 IFI4                |
| 553_METTL7A_25840      | Hs.728181 | Q9H8H3 | METTL7A PRO0066 UNQ1902/PRO4348           |
| 555_RAD21_5885         | Hs.81848  | O60216 | RAD21 HR21 KIAA0078 NXP1 SCC1             |
| 556_POGZ_23126         | Hs.489873 | Q7Z3K3 | POGZ KIAA0461 SUHW5 ZNF280E ZNF635 Nbl;   |
| 557_CTDSP1_58190       | Hs.444468 | Q9GZU7 | CTDSP1 NIF3 NLIIF SCP1                    |
| 56_ALPK1_80216         | Hs.652825 | Q96QP1 | ALPK1 KIAA1527 LAK                        |
| 561_DYNC1LI2_1783      | Hs.369068 | O43237 | DYNC1LI2 DNCLI2 LIC2                      |
| 564_HIST2H2AC_8338     | Hs.408067 | Q16777 | HIST2H2AC H2AFQ                           |

|                    |           |        |                                           |
|--------------------|-----------|--------|-------------------------------------------|
| 565_LRIG1_26018    | Hs.518055 | Q96JA1 | LRIG1 LIG1                                |
| 566_MEAF6_64769    | Hs.17118  | Q9HAF1 | MEAF6 C1orf149 CENP-28 EAF6               |
| 567_YWHAB_7529     | Hs.643544 | P31946 | YWHAB                                     |
| 568_CCNI_10983     | Hs.518827 | Q14094 | CCNI                                      |
| 569_NAP1L1_4673    | Hs.524599 | P55209 | NAP1L1 NRP                                |
| 571_CMTM4_146223   | Hs.643961 | Q8IZR5 | CMTM4 CKLFSF4                             |
| 572_DDIT4_54541    | Hs.523012 | Q9NX09 | DDIT4 REDD1 RTP801                        |
| 574_SLC19A2_10560  | Hs.30246  | O60779 | SLC19A2 THT1 TRMA                         |
| 576_H3F3B_3021     | Hs.180877 | P84243 | H3-3A H3.3A H3F3 H3F3A PP781; H3-3B H3.3E |
| 58_RPL12_6136      | Hs.408054 | P30050 | RPL12                                     |
| 580_HMGB1_3146     | Hs.434102 | P09429 | HMGB1 HMG1                                |
| 581_PDCD6IP_10015  | Hs.475896 | Q8WUM4 | PDCD6IP AIP1 ALIX KIAA1375                |
| 583_RPL9_6133      | Hs.412370 | P32969 | RPL9 OK/SW-cl.103; RPL9P7; RPL9P8; RPL9P9 |
| 584_TUBA1C_84790   | Hs.652390 | Q9BQE3 | TUBA1C TUBA6                              |
| 585_RPS24_6229     | Hs.284286 | P62847 | RPS24                                     |
| 587_BTF3_689       | Hs.591768 | P78410 | BTN3A2 BT3.2 BTF3 BTF4                    |
| 588_TPT1_7178      | Hs.374596 | P13693 | TPT1                                      |
| 589_FDPS_2224      | Hs.335918 | P14324 | FDPS FPS KIAA1293                         |
| 59_MLPH_79083      | Hs.102406 | Q9BV36 | MLPH SLAC2A                               |
| 590_PSM1_5682      | Hs.102798 | P25786 | PSMA1 HC2 NU PROS30 PSC2                  |
| 592_NET1_10276     | Hs.25155  | Q7Z628 | NET1 ARHGFE8                              |
| 593_NUDT9_53343    | Hs.149500 | Q9BW91 | NUDT9 NUDT10 PSEC0099 UNQ3012/PRO977      |
| 596_RPS23_6228     | Hs.527193 | P62266 | RPS23                                     |
| 598_GALNT7_51809   | Hs.548088 | Q86SF2 | GALNT7                                    |
| 599_COX7A2L_9167   | Hs.339639 | O14548 | COX7A2L COX7AR COX7RP                     |
| 6_EPCAM_4072       | Hs.542050 | P16422 | EPCAM GA733-2 M1S2 M4S1 MIC18 TACSTD1     |
| 60_RPL36A_6173     | Hs.432485 | P83881 | RPL36A RPL44 GIG15 MIG6                   |
| 602_REEP3_221035   | Hs.499833 | Q6NUK4 | REEP3 C10orf74                            |
| 603_PDCD7_10081    | Hs.458596 | Q8N8D1 | PDCD7                                     |
| 604_RPL10L_140801  | Hs.308332 | Q96L21 | RPL10L                                    |
| 605_YTHDF1_54915   | Hs.11747  | Q9BYJ9 | YTHDF1 C20orf21                           |
| 606_UBL5_59286     | Hs.534477 | Q9BZL1 | UBL5                                      |
| 607_C20orf30_29058 | Hs.472024 | Q96A57 | TMEM230 C20orf30 HSPC274 UNQ2432/PRO4     |
| 608_CCDC6_8030     | Hs.591360 | Q16204 | CCDC6 D10S170 TST1                        |
| 609_HNRNPD_3184    | Hs.480073 | Q14103 | HNRNPD AUF1 HNRPD                         |
| 610_USP9X_8239     | Hs.77578  | Q93008 | USP9X DFFRX FAM USP9                      |
| 611_KIAA1429_25962 | Hs.202238 | Q69YN4 | VIRMA KIAA1429 MSTP054                    |
| 612_ARHGAP1_392    | Hs.138860 | Q07960 | ARHGAP1 CDC42GAP RHOGAP1                  |
| 613_FNBP4_23360    | Hs.6834   | Q8N3X1 | FNBP4 FBP30 KIAA1014                      |
| 614_SNX3_8724      | Hs.12102  | O60493 | SNX3                                      |
| 616_GRP_2922       | Hs.153444 | O43739 | CYTH3 ARNO3 GRP1 PSCD3                    |
| 618_FKBP5_2289     | Hs.407190 | Q13451 | FKBP5 AIG6 FKBP51                         |
| 619_NSUN2_54888    | Hs.481526 | Q08J23 | NSUN2 SAKI TRM4                           |
| 62_RPL39_6170      | Hs.558387 | P62891 | RPL39                                     |
| 622_SNRPD1_6632    | Hs.464734 | P62316 | SNRPD2 SNRPD1                             |
| 624_PHB2_11331     | Hs.504620 | Q99623 | PHB2 BAP REA                              |
| 626_GOLGA3_2802    | Hs.507333 | Q08378 | GOLGA3                                    |
| 628_NFIB_4781      | Hs.644095 | O00712 | NFIB                                      |
| 629_RBM5_10181     | Hs.439480 | P52756 | RBM5 H37 LUCA15                           |
| 630_AHCYL1_10768   | Hs.485365 | O43865 | AHCYL1 DCAL IRBIT XPVKONA                 |



|                    |           |        |                                       |
|--------------------|-----------|--------|---------------------------------------|
| 631_HEXIM1_10614   | Hs.730687 | O94992 | HEXIM1 CLP1 EDG1 HIS1 MAQ1            |
| 632_NOS1_4842      | Hs.466662 | P29475 | NOS1                                  |
| 633_USP54_159195   | Hs.657355 | Q70EL1 | USP54 C10orf29                        |
| 634_MRPL41_64975   | Hs.44017  | Q8IXM3 | MRPL41 BMRP MRPL27 RPML27 PIG3        |
| 635_GUCY1A3_2982   | Hs.24258  | Q02108 | GUCY1A1 GUC1A3 GUCSA3 GUCY1A3         |
| 638_RYBP_23429     | Hs.7910   | Q8N488 | RYBP DEDAF YEAF1                      |
| 639_HECTD1_25831   | Hs.708017 | Q9ULT8 | HECTD1 KIAA1131                       |
| 64_COX6C_1345      | Hs.351875 | P09669 | COX6C                                 |
| 640_VPS35_55737    | Hs.454528 | Q96QK1 | VPS35 MEM3 TCCCTA00141                |
| 641_TMSB4X_7114    | Hs.437277 | P62328 | TMSB4X TB4X THYB4 TMSB4               |
| 642_ERH_2079       | Hs.509791 | P84090 | ERH                                   |
| 644_WASF2_10163    | Hs.469244 | Q9Y6W5 | WASF2 WAVE2                           |
| 646_FASTK_10922    | Hs.647094 | Q14296 | FASTK                                 |
| 647_GOLGB1_2804    | Hs.213389 | Q14789 | GOLGB1                                |
| 649_TCP1_6950      | Hs.363137 | P17987 | TCP1 CCT1 CCTA                        |
| 65_ZKSCAN1_7586    | Hs.615360 | P17029 | ZKSCAN1 KOX18 ZNF139 ZNF36            |
| 650_SQLE_6713      | Hs.71465  | Q14534 | SQLE ERG1                             |
| 653_NUFIP2_57532   | Hs.462598 | Q7Z417 | NUFIP2 KIAA1321 PIG1                  |
| 654_RPS3_6188      | Hs.356572 | P23396 | RPS3 OK/SW-cl.26                      |
| 656_ANK3_288       | Hs.499725 | Q12955 | ANK3                                  |
| 657_LRPAP1_4043    | Hs.533136 | P30533 | LRPAP1 A2MRAP                         |
| 658_CASC4_113201   | Hs.512867 | Q6P4E1 | CASC4 UNQ2573/PRO6308                 |
| 660_GRB10_2887     | Hs.164060 | Q13322 | GRB10 GRBIR KIAA0207                  |
| 661_EDF1_8721      | Hs.174050 | O60869 | EDF1                                  |
| 662_AUTS2_26053    | Hs.21631  | Q8WXX7 | AUTS2 KIAA0442                        |
| 663_ZFAND6_54469   | Hs.730626 | Q6FIF0 | ZFAND6 AWP1 ZA20D3 HT032              |
| 665_SLC2A4RG_56731 | Hs.435126 | Q9NR83 | SLC2A4RG HDBP1                        |
| 666_RRAGA_10670    | Hs.702275 | Q7L523 | RRAGA                                 |
| 667_RNF130_55819   | Hs.484363 | Q86XS8 | RNF130                                |
| 669_IFT57_55081    | Hs.412196 | Q9NWB7 | IFT57 DERP8 ESRRBL1 HIPPI             |
| 672_PTP4A1_7803    | Hs.227777 | Q93096 | PTP4A1 PRL1 PTPCAAX1                  |
| 674_HIST1H2BL_8340 | Hs.137594 | Q99880 | H2BC13 H2BFC HIST1H2BL                |
| 675_SOCS2_8835     | Hs.485572 | O14508 | SOCS2 CIS2 SSI2 STATI2                |
| 676_EIF3A_8661     | Hs.523299 | P56537 | EIF6 EIF3A ITGB4BP OK/SW-cl.27        |
| 677_ZNF598_90850   | Hs.343828 | Q86UK7 | ZNF598                                |
| 679_SELS_55829     | Hs.32148  | Q9BQE4 | SELENOS SELS VIMP AD-015 SBBi8        |
| 68_GNAS_2778       | Hs.125898 | Q5JWF2 | GNAS GNAS1                            |
| 681_RPSA_3921      | Hs.449909 | P08865 | RPSA LAMBR LAMR1                      |
| 682_ARFGAP3_26286  | Hs.685225 | Q9NP61 | ARFGAP3 ARFGAP1                       |
| 683_MRPL3_11222    | Hs.205163 | P09001 | MRPL3 MRL3 RPML3                      |
| 692_ANAPC5_51433   | Hs.7101   | Q9UJX4 | ANAPC5 APC5                           |
| 693_ZMAT2_153527   | Hs.350194 | Q96NC0 | ZMAT2                                 |
| 694_GCN1L1_10985   | Hs.298716 | Q92616 | GCN1 GCN1L1 KIAA0219                  |
| 696_ECI2_10455     | Hs.15250  | O75521 | ECI2 DRS1 HCA88 PECl                  |
| 697_N4BP2L2_10443  | Hs.507680 | Q92802 | N4BP2L2 CG005 PFAAP5                  |
| 698_SF1_7536       | Hs.502829 | Q13285 | NR5A1 AD4BP FTZF1 SF1                 |
| 699_RGPD5_84220    | Hs.469630 | Q99666 | RGPD5 RANBP2L1 RGP5 RGP7 RGPD7; RGPD6 |
| 70_RPL32_6161      | Hs.265174 | P62910 | RPL32 PP9932                          |
| 700_CBX1_10951     | Hs.77254  | P83916 | CBX1 CBX                              |
| 702_ZNF395_55893   | Hs.435535 | Q9H8N7 | ZNF395 HDBP2 PBF                      |

|                    |           |        |                                           |
|--------------------|-----------|--------|-------------------------------------------|
| 704_XRCC6_2547     | Hs.292493 | P12956 | XRCC6 G22P1                               |
| 706_CYHR1_50626    | Hs.459379 | Q6ZMK1 | CYHR1 KIAA0496                            |
| 707_MORF4L1_10933  | Hs.374503 | Q9UBU8 | MORF4L1 MRG15 FWP006 HSPC008 HSPC061      |
| 708_CYTH1_9267     | Hs.191215 | Q15438 | CYTH1 D17S811E PSCD1                      |
| 709_NAMPT_10135    | Hs.489615 | P43490 | NAMPT PBEF PBEF1                          |
| 71_SERF2_10169     | Hs.424126 | P84101 | SERF2 FAM2C                               |
| 711_ENY2_56943     | Hs.492555 | Q9NPA8 | ENY2 DC6                                  |
| 712_HIST1H2AK_8330 | Hs.558421 | P0C0S8 | H2AC11 H2AFP HIST1H2AG; H2AC13 H2AFC HI   |
| 713_SERBP1_26135   | Hs.730604 | Q8NC51 | SERBP1 PAIRBP1 CGI-55                     |
| 714_MYH9_4627      | Hs.474751 | P35579 | MYH9                                      |
| 716_GTF3C6_112495  | Hs.418520 | Q969F1 | GTF3C6 C6orf51 CDA020 NPD020              |
| 718_HIST1H4C_8364  | Hs.46423  | P62805 | H4C1 H4/A H4FA HIST1H4A; H4C2 H4/I H4FI H |
| 719_FAM156A_29057  | Hs.653131 | Q8NDB6 | FAM156A TMEM29 PP12994 PRO0659; FAM1      |
| 720_SNRPC_6631     | Hs.1063   | P09234 | SNRPC                                     |
| 721_HADH_3033      | Hs.438289 | Q99714 | HSD17B10 ERAB HADH2 MRPP2 SCHAD SDR5C     |
| 724_CCT3_7203      | Hs.491494 | P49368 | CCT3 CCTG TRIC5                           |
| 726_HIPK2_28996    | Hs.397465 | Q9H2X6 | HIPK2                                     |
| 727_JUN_3725       | Hs.696684 | P05412 | JUN                                       |
| 729_HSPA8_3312     | Hs.180414 | P11142 | HSPA8 HSC70 HSP73 HSPA10                  |
| 73_SORD_6652       | Hs.878    | Q00796 | SORD                                      |
| 730_ACAD9_28976    | Hs.567482 | Q9H845 | ACAD9                                     |
| 731_F5_2153        | Hs.352638 | P12259 | F5                                        |
| 732_NUP62_23636    | Hs.574492 | P37198 | NUP62                                     |
| 734_MRPL51_51258   | Hs.55847  | Q4U2R6 | MRPL51 MRP64 CDA09 HSPC241                |
| 735_ATP6V1A_523    | Hs.477155 | P38606 | ATP6V1A ATP6A1 ATP6V1A1 VPP2              |
| 736_PMPCB_9512     | Hs.184211 | O75439 | PMPCB MPPB                                |
| 738_SPATS2L_26010  | Hs.120323 | Q9NUQ6 | SPATS2L DNAPT6 SP1224                     |
| 740_PA2G4_5036     | Hs.524498 | Q9UQ80 | PA2G4 EBP1                                |
| 741_DDX5_1655      | Hs.279806 | P17844 | DDX5 G17P1 HELR HLR1                      |
| 744_C21orf59_56683 | Hs.5811   | P57076 | CFAP298 C21orf48 C21orf59                 |
| 746_S100A10_6281   | Hs.143873 | P60903 | S100A10 ANX2LG CAL1L CLP11                |
| 747_TSPAN8_7103    | Hs.170563 | P19075 | TSPAN8 TM4SF3                             |
| 748_C22orf28_51493 | Hs.474643 | Q9Y3I0 | RTCB C22orf28 HSPC117                     |
| 749_STEAP2_261729  | Hs.489051 | Q8NFT2 | STEAP2 PCANAP1 STAMP1 UNQ6507/PRO232      |
| 75_RPS15A_6210     | Hs.370504 | P62244 | RPS15A OK/SW-cl.82                        |
| 750_NACAP1_83955   | Hs.567608 | Q9BZK3 | NACA4P NACAP1 FKSG17                      |
| 751_TRAM1_23471    | Hs.491988 | Q9Y6Q9 | NCOA3 AIB1 BHLHE42 RAC3 TRAM1             |
| 752_BCAP31_10134   | Hs.522817 | P51572 | BCAP31 BAP31 DXS1357E                     |
| 754_AZGP1_563      | Hs.546239 | P25311 | AZGP1 ZAG ZNGP1                           |
| 755_EHF_26298      | Hs.653859 | Q9NZC4 | EHF ESE3 ESE3B ESEJ                       |
| 757_BAG1_573       | Hs.377484 | Q99933 | BAG1 HAP                                  |
| 758_C12orf23_90488 | Hs.257664 | Q8WUH6 | TMEM263 C12orf23                          |
| 759_PSMD4_5710     | Hs.505059 | P55036 | PSMD4 MCB1                                |
| 76_RPL30_6156      | Hs.400295 | P62888 | RPL30                                     |
| 760_TALDO1_6888    | Hs.438678 | P37837 | TALDO1 TAL TALDO TALDOR                   |
| 761_MCM3_4172      | Hs.179565 | P25205 | MCM3                                      |
| 763_SRP14_6727     | Hs.533732 | P37108 | SRP14                                     |
| 764_ATP5J2_9551    | Hs.521056 | P56134 | ATP5MF ATP5J2 ATP5JL                      |
| 765_ANKRD36_375248 | Hs.541894 | Q96IX9 | ANKRD36BP1 ANKRD26L1                      |
| 766_RPS4Y2_140032  | Hs.367761 | Q8TD47 | RPS4Y2 RPS4Y2P                            |

|                      |           |        |                                          |
|----------------------|-----------|--------|------------------------------------------|
| 767_DDX50_79009      | Hs.522984 | Q9BQ39 | DDX50                                    |
| 768_NUCKS1_64710     | Hs.213061 | Q9H1E3 | NUCKS1 NUCKS JC7                         |
| 769_PRDX6_9588       | Hs.120    | P30041 | PRDX6 AOP2 KIAA0106                      |
| 77_SP100_6672        | Hs.369056 | P23497 | SP100                                    |
| 770_ODC1_4953        | Hs.467701 | P11926 | ODC1                                     |
| 771_HNRNPR_10236     | Hs.373763 | O43390 | HNRNPR HNRPR                             |
| 772_MARS_4141        | Hs.632707 | P56192 | MARS                                     |
| 773_PHF8_23133       | Hs.133352 | Q9UPP1 | PHF8 KIAA1111 ZNF422                     |
| 775_KIAA2013_90231   | Hs.520094 | Q8IYS2 | KIAA2013                                 |
| 776_PLA2G16_11145    | Hs.502775 | P53816 | PLAAT3 HRASLS3 HREV107 PLA2G16           |
| 778_FAM120AOS_158293 | Hs.350364 | Q5T036 | FAM120AOS C9orf100S                      |
| 779_POLR2L_5441      | Hs.441072 | P62875 | POLR2L                                   |
| 78_RPL11_6135        | Hs.719951 | P62913 | RPL11                                    |
| 781_ATP1A1_476       | Hs.371889 | P05023 | ATP1A1                                   |
| 782_MRPL20_55052     | Hs.730767 | Q9BYC9 | MRPL20                                   |
| 783_RAMP1_10267      | Hs.471783 | O60894 | RAMP1                                    |
| 784_FBL_2091         | Hs.299002 | Q9UKA2 | FBXL4 FBL4 FBL5                          |
| 786_SNRPD2_6633      | Hs.515472 | P62316 | SNRPD2 SNRPD1                            |
| 787_ERRFI1_54206     | Hs.605445 | Q9UJM3 | ERRFI1 MIG6                              |
| 788_IVNS1ABP_10625   | Hs.497183 | Q9Y6Y0 | IVNS1ABP ARA3 FLARA3 KIAA0850 KLHL39 NS: |
| 790_STK24_8428       | Hs.508514 | Q9Y6E0 | STK24 MST3 STK3                          |
| 791_HIST1H2BF_8343   | Hs.182137 | P62807 | H2BC4 H2BFL HIST1H2BC; H2BC6 H2BFH HIST: |
| 795_UQCRC2_7385      | Hs.528803 | P22695 | UQCRC2                                   |
| 797_MARCH6_10299     |           | O60337 | MARCH6 KIAA0597 RNF176 TEB4              |
| 799_MAPRE1_22919     | Hs.472437 | Q15691 | MAPRE1                                   |
| 80_RPL27A_6157       | Hs.523463 | P46776 | RPL27A                                   |
| 800_FAM129A_116496   | Hs.518662 | Q9BZQ8 | NIBAN1 C1orf24 FAM129A NIBAN GIG39       |
| 801_GRSF1_2926       | Hs.309763 | Q12849 | GRSF1                                    |
| 803_LDHA_3939        | Hs.2795   | P00338 | LDHA PIG19                               |
| 805_WSB2_55884       | Hs.728135 | Q9NYS7 | WSB2                                     |
| 806_CSDE1_7812       | Hs.69855  | O75534 | CSDE1 D1S155E KIAA0885 NRU UNR           |
| 807_SNRPG_6637       | Hs.516076 | P62308 | SNRPG PBSCG                              |
| 809_PDS5A_23244      | Hs.331431 | Q29RF7 | PDS5A KIAA0648 PDS5 PIG54                |
| 81_RPS8_6202         | Hs.512675 | P62241 | RPS8 OK/SW-cl.83                         |
| 811_H3F3C_440093     | Hs.448697 | Q6NXT2 | H3F3C                                    |
| 814_CASP9_842        | Hs.329502 | P55211 | CASP9 MCH6                               |
| 816_ZFAND5_7763      | Hs.406096 | O76080 | ZFAND5 ZA20D2 ZNF216                     |
| 818_ILF3_3609        | Hs.465885 | Q12906 | ILF3 DRBF MPHOSPH4 NF90                  |
| 819_ZFP36_7538       | Hs.503093 | P26651 | ZFP36 G0S24 NUP475 RNF162A TIS11A TTP    |
| 821_RBM39_9584       | Hs.282901 | Q14498 | RBM39 HCC1 RNPC2                         |
| 822_RPS27L_51065     | Hs.108957 | Q71UM5 | RPS27L                                   |
| 823_UBE2E3_10477     | Hs.470804 | Q969T4 | UBE2E3 UBCE4 UBCH9                       |
| 826_RSRC2_65117      | Hs.432996 | Q7L4I2 | RSRC2                                    |
| 827_PRR11_55771      | Hs.631750 | Q96HE9 | PRR11                                    |
| 828_HEBP1_50865      | Hs.642618 | Q9NRV9 | HEBP1 HBP                                |
| 830_ZNF664_144348    | Hs.524828 | Q8N3J9 | ZNF664 ZFOC1 ZNF176                      |
| 831_CCT7_10574       | Hs.368149 | Q99832 | CCT7 CCTH NIP7-1                         |
| 832_RPL3_6122        | Hs.438227 | P39023 | RPL3 OK/SW-cl.32                         |
| 833_ZMPSTE24_10269   | Hs.132642 | O75844 | ZMPSTE24 FACE1 STE24                     |
| 834_SRSF4_6429       | Hs.469970 | Q08170 | SRSF4 SFRS4 SRP75                        |

|                    |           |        |                                         |
|--------------------|-----------|--------|-----------------------------------------|
| 836_TBRG1_84897    | Hs.436410 | Q3YBR2 | TBRG1 NIAM                              |
| 837_BBX_56987      | Hs.124366 | Q8WY36 | BBX HBP2                                |
| 839_IL13RA1_3597   | Hs.496646 | P78552 | IL13RA1 IL13R IL13RA                    |
| 840_HIST1H2AM_8336 | Hs.134999 | P0C0S8 | H2AC11 H2AFP HIST1H2AG; H2AC13 H2AFC HI |
| 841_ASNS_440       | Hs.489207 | P08243 | ASNS TS11                               |
| 844_FNBP1L_54874   | Hs.134060 | Q5TON5 | FNBP1L C1orf39 TOCA1                    |
| 847_TMC5_79838     | Hs.115838 | Q6UXY8 | TMC5 UNQ8238/PRO33604                   |
| 849_BASP1_10409    | Hs.201641 | P80723 | BASP1 NAP22                             |
| 85_RPL38_6169      | Hs.380953 | P63173 | RPL38                                   |
| 852_RAI1_10743     | Hs.55148  | Q7Z5J4 | RAI1 KIAA1820                           |
| 853_NBR1_4077      | Hs.277721 | Q14596 | NBR1 1A13B KIAA0049 M17S2 MIG19         |
| 854_SORL1_6653     | Hs.368592 | Q92673 | SORL1 C11orf32                          |
| 855_PDCD4_27250    | Hs.711490 | Q53EL6 | PDCD4 H731                              |
| 856_HES1_3280      | Hs.250666 | Q14469 | HES1 BHLHB39 HL HRY                     |
| 857_RPL15_6138     | Hs.381219 | P61313 | RPL15 EC45 TCBAP0781                    |
| 859_KIAA1522_57648 | Hs.591502 | Q9P206 | KIAA1522                                |
| 861_PNN_5411       | Hs.409965 | Q9H307 | PNN DRS MEMA                            |
| 865_PSME1_5720     | Hs.75348  | Q06323 | PSME1 IFI5111                           |
| 866_MYL12A_10627   | Hs.190086 | P19105 | MYL12A MLCB MRLC3 RLC                   |
| 867_KHDRBS1_10657  | Hs.445893 | Q07666 | KHDRBS1 SAM68                           |
| 868_MPZL1_9019     | Hs.493919 | O95297 | MPZL1 PZR UNQ849/PRO1787                |
| 869_COX7B_1349     | Hs.522699 | P24311 | COX7B                                   |
| 87_NBEAL1_65065    | Hs.408054 | Q6ZS30 | NBEAL1 ALS2CR16 ALS2CR17                |
| 870_CBX3_11335     | Hs.381189 | Q13185 | CBX3                                    |
| 872_RASD1_51655    | Hs.25829  | Q9Y272 | RASD1 AGS1 DEXRAS1                      |
| 873_SHROOM3_57619  | Hs.702168 | Q8TF72 | SHROOM3 KIAA1481 SHRML MSTP013          |
| 874_C15orf24_56851 | Hs.160565 | Q9NPA0 | EMC7 C11orf3 C15orf24 HT022 UNQ905/PRO: |
| 876_SON_6651       | Hs.517262 | P18583 | SON C21orf50 DBP5 KIAA1019 NREBP HSPC31 |
| 877_KCTD3_51133    | Hs.335139 | Q9Y597 | KCTD3                                   |
| 879_CREB3L4_148327 | Hs.372924 | Q8TEY5 | CREB3L4 AIBZIP CREB4 JAL                |
| 88_RPL22_6146      | Hs.515329 | P35268 | RPL22                                   |
| 883_UBE2C_11065    | Hs.93002  | O00762 | UBE2C UBCH10                            |
| 885_TBCD_6904      | Hs.464391 | Q9BTW9 | TBCD KIAA0988 SSD1 TFCD PP1096          |
| 887_DNAJC10_54431  | Hs.516632 | Q8IXB1 | DNAJC10 ERDJ5 UNQ495/PRO1012            |
| 888_CKS1B_1163     | Hs.374378 | P61024 | CKS1B CKS1 PNAS-143 PNAS-16             |
| 889_CSNK1E_1454    | Hs.474833 | P49674 | CSNK1E                                  |
| 890_RRAGC_64121    | Hs.532461 | Q9HB90 | RRAGC                                   |
| 891_PTPLAD1_51495  | Hs.512973 | Q9P035 | HACD3 BIND1 PTPLAD1                     |
| 893_UPF1_5976      | Hs.515266 | Q92900 | UPF1 KIAA0221 RENT1                     |
| 894_PPP1R16A_84988 | Hs.521937 | Q96I34 | PPP1R16A MYPT3                          |
| 896_PTCO3_55037    | Hs.323489 | Q96EY7 | PTCO3 MRPS39 TRG15                      |
| 899_RNF103_7844    | Hs.469199 | O00237 | RNF103 ZFP103                           |
| 9_RAX2_84839       | Hs.532691 | Q96IS3 | RAX2 QRX RAXL1                          |
| 90_TXNIP_10628     | Hs.533977 | Q9H3M7 | TXNIP VDUP1                             |
| 903_AHSA2_130872   | Hs.655602 | Q71910 | AHSA2P AHSA2                            |
| 905_MKL2_57496     | Hs.49143  | Q9ULH7 | MRTFB KIAA1243 MKL2                     |
| 906_GTF3A_2971     | Hs.445977 | Q92664 | GTF3A                                   |
| 907_ACADVL_37      | Hs.437178 | P49748 | ACADVL VLCAD                            |
| 910_KIAA1191_57179 | Hs.730636 | Q96A73 | KIAA1191 P33MONOX                       |
| 912_EIF2B1_1967    | Hs.728874 | Q14232 | EIF2B1 EIF2BA                           |

|                            |           |        |                                            |
|----------------------------|-----------|--------|--------------------------------------------|
| 915_SMS_6611               | Hs.727552 | Q86VZ5 | SGMS1 MOB SMS1 TMEM23                      |
| 916_SUMO2_6613             | Hs.546298 | P61956 | SUMO2 SMT3B SMT3H2                         |
| 918_MT1G_4495              | Hs.433391 | P13640 | MT1G MT1K MT1M                             |
| 919_HADHB_3032             | Hs.515848 | P55084 | HADHB MSTP029                              |
| 92_WDR45L_56270            | Hs.132161 | Q5MNZ6 | WDR45B WDR45L WIP13                        |
| 921_RANBP9_10048           | Hs.708182 | Q96P70 | IPO9 IMP9 KIAA1192 RANBP9 HSPC273          |
| 922_CEP95_90799            | Hs.569713 | Q96GE4 | CEP95 CCDC45 CEP45                         |
| 923_MRPS6_64968            | Hs.302742 | P82932 | MRPS6 C21orf101 RPMS6                      |
| 924_IRX3_79191             | Hs.499205 | P78415 | IRX3 IRXB1                                 |
| 928_LOC653061_653061       | Hs.547454 |        |                                            |
| 929_SPARCL1_8404           | Hs.62886  | Q14515 | SPARCL1                                    |
| 93_PABPC3_5042             | Hs.458280 | Q9H361 | PABPC3 PABP3 PABPL3                        |
| 930_CEBPB_1051             | Hs.517106 | P17676 | CEBPB TCF5 PP9092                          |
| 932_ATP6V0B_533            | Hs.596514 | Q99437 | ATP6V0B ATP6F                              |
| 933_VCP_7415               | Hs.529782 | P55072 | VCP                                        |
| 935_HIPK3_10114            | Hs.709696 | Q9H422 | HIPK3 DYRK6 FIST3 PKY                      |
| 936_SESN3_143686           | Hs.120633 | P58005 | SESN3 SEST3                                |
| 937_MYL6_4637              | Hs.632717 | P60660 | MYL6                                       |
| 938_HMG1_3150              | Hs.356285 | P05114 | HMG1 HMG14                                 |
| 939_RNF220_55182           | Hs.456557 | Q5VTB9 | RNF220 C1orf164                            |
| 94_SMN1_6606               | Hs.535788 | Q16637 | SMN1 SMN SMNT; SMN2 SMNC                   |
| 940_LIMCH1_22998           | Hs.335163 | Q9UPQ0 | LIMCH1 KIAA1102                            |
| 941_PSMC1_5700             | Hs.356654 | P62191 | PSMC1                                      |
| 942_DNAJA1_3301            | Hs.445203 | P31689 | DNAJA1 DNAJ2 HDJ2 HSI2 HSPF4               |
| 946_NKTR_4820              | Hs.529509 | P30414 | NKTR                                       |
| 947_HSD17B12_51144         | Hs.132513 | Q53GQ0 | HSD17B12 SDR12C1                           |
| 948_IMMT_10989             | Hs.148559 | Q16891 | IMMT HMP MIC60 MINOS2 PIG4 PIG52           |
| 949_DNAJB6_10049           | Hs.593923 | O75190 | DNAJB6 HSI2 MRJ MSJ1                       |
| 95_AHNAK_79026             | Hs.502756 | Q8IVF2 | AHNAK2 C14orf78 KIAA2019                   |
| 950_LOC100287195_100287195 | Hs.528369 |        |                                            |
| 951_ENTPD6_955             | Hs.500375 | O75354 | ENTPD6 CD39L2 IL6ST2                       |
| 954_FAM177A1_283635        | Hs.446357 | Q8N128 | FAM177A1 C14orf24                          |
| 955_TCEA1_6917             | Hs.491745 | P23193 | TCEA1 GTF2S TFII5                          |
| 956_RBM14_10432            | Hs.714949 | Q96PK6 | RBM14 SIP                                  |
| 957_COPB2_9276             | Hs.75724  | P35606 | COPB2                                      |
| 958_SAT2_112483            | Hs.10846  | Q96QD8 | SLC38A2 ATA2 KIAA1382 SAT2 SNAT2           |
| 959_NCOR2_9612             | Hs.137510 | Q9Y618 | NCOR2 CTG26                                |
| 96_ND1_4535                | Hs.511386 | P03886 | MT-ND1 MTND1 NADH1 ND1                     |
| 960_SEPT2_4735             |           | Q15019 | SEPTIN2 DIFF6 KIAA0158 NEDD5 SEPT2         |
| 961_GGA1_26088             | Hs.499158 | Q9UJY5 | GGA1                                       |
| 963_MUT_4594               | Hs.485527 | P22033 | MMUT MUT                                   |
| 965_DAZAP1_26528           | Hs.222510 | Q96EP5 | DAZAP1                                     |
| 966_TARS_6897              | Hs.481860 | P26639 | TARS1 TARS                                 |
| 967_FAM111A_63901          | Hs.150651 | Q96P22 | FAM111A KIAA1895                           |
| 968_CXCR4_7852             | Hs.593413 | P61073 | CXCR4                                      |
| 969_C8orf4_56892           | Hs.591849 | Q9NR00 | TCIM C8orf4 TC1                            |
| 972_AK2_204                | Hs.470907 | P54819 | AK2 ADK2                                   |
| 973_TTC19_54902            | Hs.462316 | Q6DKK2 | TTC19                                      |
| 974_EIF3L_51386            | Hs.446852 | Q9Y262 | EIF3L EIF3EIP EIF3S6IP HSPC021 HSPC025 MST |
| 976_FOXP1_27086            | Hs.431498 | Q9H334 | FOXP1 HSPC215                              |

|                                            |           |            |                                        |
|--------------------------------------------|-----------|------------|----------------------------------------|
| 977_SECISBP2_79048                         | Hs.59804  | Q96T21     | SECISBP2 SBP2                          |
| 978_CHERP_10523                            | Hs.631627 | Q8IWX8     | CHERP DAN26 SCAF6                      |
| 981_HIST3H2A_92815                         | Hs.26331  | Q7L7L0     | HIST3H2A                               |
| 982_MRPL32_64983                           | Hs.50252  | Q6P1L8     | MRPL14 MRPL32 RPML32                   |
| 983_PURB_5814                              | Hs.728785 | Q96QR8     | PURB                                   |
| 985_CALD1_800                              | Hs.490203 | Q05682     | CALD1 CAD CDM                          |
| 987_DDX47_51202                            | Hs.719938 | Q9H0S4     | DDX47                                  |
| 989_HSD17B4_3295                           | Hs.406861 | P51659     | HSD17B4 EDH17B4 SDR8C1                 |
| 99_RPS18_6222                              | Hs.655329 | P62269     | RPS18 D6S218E                          |
| 990_AKAP9_10142                            | Hs.651221 | Q99996     | AKAP9 AKAP350 AKAP450 KIAA0803         |
| 991_TSFM_10102                             | Hs.632704 | P43897     | TSFM                                   |
| 994_GAR1_54433                             | Hs.69851  | Q9NY12     | GAR1 NOLA1                             |
| 995_EED_8726                               | Hs.503510 | O75530     | EED                                    |
| 997_ZNF275_10838                           | Hs.348963 | Q9NSD4     | ZNF275                                 |
| 998_SLC38A10_124565                        | Hs.352240 | Q9HBR0     | SLC38A10 PP1744                        |
| 999_MRP63_78988                            | Hs.458367 | Q9BQC6     | MRPL57 MRP63                           |
| ADT14                                      |           | Q9NZN5     | ARHGEF12 KIAA0382 LARG                 |
| ADT2                                       |           | P35609     | ACTN2                                  |
| ADT20                                      |           | Q9UNZ2     | NSFL1C UBXN2C                          |
| ADT26                                      |           | P35749     | MYH11 KIAA0866                         |
| ADT28                                      |           | A0A024R7P5 | LOC388524 hCG_20807                    |
| ADT3                                       |           | Q99743     | NPAS2 BHLHE9 MOP4 PASD4                |
| ADT6                                       |           | Q13368     | MPP3 DLG3                              |
| ADT9                                       |           | Q15714     | TSC22D1 KIAA1994 TGFB1I4 TSC22 hucep-2 |
| ANO1_AS1_T062911_G014510_1_447_1019_573    |           |            |                                        |
| ANO1_AS1_T062911_G014510_2_398_895_498     |           |            |                                        |
| BOLA3_AS1_T191973_G044207_1_1427_1822_396  |           |            |                                        |
| CAT1367_T060449_G014057_1_30_1331_1302     |           |            |                                        |
| CAT1367_T060449_G014057_2_532_807_276      |           |            |                                        |
| CAT1449.1_T070828_G016390_1_238_720_483    |           |            |                                        |
| CAT1449.1_T070828_G016390_2_401_652_252    |           |            |                                        |
| CAT151.3_T027960_G006287_2_15387_15731_345 |           |            |                                        |
| CAT1651_T102861_G024234_1_1199_1891_693    |           |            |                                        |
| CAT1686_T107057_G025268_1_5122_5934_813    |           |            |                                        |
| CAT1917.2_T144453_G033626_1_2303_2959_657  |           |            |                                        |
| CAT1942_T149369_G034642_1_6407_7270_864    |           |            |                                        |
| CAT1968.2_T153055_G035480_2_2275_2736_462  |           |            |                                        |
| CAT239_T189457_G043567_1_3047_3727_681     |           |            |                                        |
| CAT297_T196839_G045377_1_2510_3112_603     |           |            |                                        |
| CAT446.1_T250066_G057497_1_562_1254_693    |           |            |                                        |
| CAT583_T271074_G062826_1_2272_2871_600     |           |            |                                        |
| CAT668.2_T283555_G066082_1_5822_6478_657   |           |            |                                        |
| CAT668.2_T283555_G066082_2_6783_7376_594   |           |            |                                        |
| CTA11                                      |           | Q9UBF1     | MAGEC2 HCA587 MAGEE1                   |
| CTA13                                      |           | Q9UNA0     | ADAMTS5 ADAMTS11 ADMP2                 |
| CTA15                                      |           | Q8NEN9     | PDZD8 PDZK8                            |
| CTA16                                      |           | Q969F0     | FATE1 FATE                             |
| CTA18                                      |           | Q13136     | PPFIA1 LIP1                            |
| CTA2                                       |           | Q16385     | SSX2 SSX2A; SSX2B                      |
| CTA21                                      |           | P43366     | MAGEB1 MAGEL1 MAGEXP                   |



|                                              |        |                                         |
|----------------------------------------------|--------|-----------------------------------------|
| CTA22                                        | O15479 | MAGEB2                                  |
| CTA24                                        | Q16384 | SSX1                                    |
| CTA27                                        | Q9UNF1 | MAGED2 BCG1                             |
| CTA28                                        | Q9UHG2 | PCSK1N                                  |
| CTA5                                         | O60224 | SSX4 SSX4A; SSX4B                       |
| CTA6                                         | Q9GZY0 | NXF2 TAPL2; NXF2B                       |
| CTA8                                         | Q9HD64 | XAGE1A GAGED2 XAGE1; XAGE1B; XAGE1C; X/ |
| FAM83H_AS1.5_T353728_G083462_1_2453_3277_825 |        |                                         |
| FBXL19_AS1_T130509_G030577_1_4499_4918_420   |        |                                         |
| LINC00675.4_T141809_G033025_1_1138_1524_387  |        |                                         |
| PCA10                                        | P01619 | IGKV3-20                                |
| PCA13                                        | Q9H4A3 | WNK1 HSN2 KDP KIAA0344 PRKWNK1          |
| PCA14                                        | Q86UV5 | USP48 USP31                             |
| PCA19                                        | Q15435 | PPP1R7 SDS22                            |
| PCA22                                        | O15031 | PLXNB2 KIAA0315                         |
| PCA27                                        | P68104 | EEF1A1 EEF1A EF1A LENG7                 |
| PCA29                                        | Q14149 | MORC3 KIAA0136 NXP2 ZCWCC3              |
| PCA6                                         | P29144 | TPP2                                    |
| PCAT1_T351126_G082910_1_3108_3569_462        |        |                                         |
| PCAT1_T351126_G082910_2_1371_1655_285        |        |                                         |
| PRCAT104.1_T230582_G053084_2_4907_5623_717   |        |                                         |
| PRCAT104.3_T230574_G053084_2_6009_6725_717   |        |                                         |
| PRCAT104.4_T230577_G053084_1_1393_2109_717   |        |                                         |
| PRCAT104.5_T230585_G053084_2_4999_5715_717   |        |                                         |
| PRCAT104.7_T230583_G053084_2_4930_5646_717   |        |                                         |
| PRCAT11.3_T317393_G074313_1_1665_2435_771    |        |                                         |
| PRCAT139_T035222_G008006_2_2852_3289_438     |        |                                         |
| PRCAT182_T137385_G032197_1_4841_5419_579     |        |                                         |
| PRCAT188.2_T382727_G090657_1_4263_4976_714   |        |                                         |
| PRCAT188.2_T382727_G090657_2_1887_2474_588   |        |                                         |
| PRCAT236_T273012_G063396_1_1305_2057_753     |        |                                         |
| PRCAT28.1_T183157_G042036_1_3585_4718_1134   |        |                                         |
| PRCAT28.1_T183157_G042036_2_4136_5131_996    |        |                                         |
| PRCAT28.4_T183159_G042036_1_1382_2515_1134   |        |                                         |
| PRCAT28.4_T183159_G042036_2_1933_2928_996    |        |                                         |
| PRCAT282_T344692_G081083_2_2771_2995_225     |        |                                         |
| PRCAT41_T315818_G074087_2_4464_4820_357      |        |                                         |
| PRO10                                        | P40121 | CAPG AFCP MCP                           |
| PRO11                                        | P23280 | CA6                                     |
| PRO14                                        | Q02224 | CENPE                                   |
| PRO16                                        | Q9ULV8 | CBLC CBL3 RNF57                         |
| PRO18                                        | Q12802 | AKAP13 BRX HT31 LBC                     |
| PRO23                                        | Q7Z7E8 | UBE2Q1 NICE5 UBE2Q PRO3094              |
| PRO25                                        | Q9NP31 | SH2D2A SCAP TSAD VRAP                   |
| PRO29                                        | O75521 | ECI2 DRS1 HCA88 PECl                    |
| PRO3                                         | P05067 | APP A4 AD1                              |
| PRO30                                        | Q9HCK8 | CHD8 HELSNF1 KIAA1564                   |
| PRO31                                        | Q9UNE7 | STUB1 CHIP PP1131                       |
| PRO37                                        | Q9BXL7 | CARD11 CARMA1                           |
| PRO38                                        | P15311 | EZR VIL2                                |

PRO40

Q92791

P3H4 LEPREL4 NOL55 SC65

SPATA41\_T123512\_G029083\_1\_801\_1718\_918

SPATA41\_T123512\_G029083\_2\_2954\_3229\_276





IST1H4B; H4C3 H4/G H4FG HIST1H4C; H4C4 H4/B H4FB HIST1H4D; H4C5 H4/J H4FJ HIST1H4E; H4C6 H4/C

IST1H2AI; H2AC15 H2AFD HIST1H2AK; H2AC16 H2AFI HIST1H2AL; H2AC17 H2AFN HIST1H2AM





























IST1H2AI; H2AC15 H2AFD HIST1H2AK; H2AC16 H2AFI HIST1H2AL; H2AC17 H2AFN HIST1H2AM

IST1H4B; H4C3 H4/G H4FG HIST1H4C; H4C4 H4/B H4FB HIST1H4D; H4C5 H4/J H4FJ HIST1H4E; H4C6 H4/C



IST1H2AI; H2AC15 H2AFD HIST1H2AK; H2AC16 H2AFI HIST1H2AL; H2AC17 H2AFN HIST1H2AM















∩ H4FC HIST1H4F; H4C8 H4/H H4FH HIST1H4H; H4C9 H4/M H4FM HIST1H4I; H4C11 H4/E H4FE HIST1H4J;





























∩ H4FC HIST1H4F; H4C8 H4/H H4FH HIST1H4H; H4C9 H4/M H4FM HIST1H4I; H4C11 H4/E H4FE HIST1H4J;



















H4C12 H4/D H4FD HIST1H4K; H4C13 H4/K H4FK HIST1H4L; H4C14 H4/N H4F2 H4FN HIST2H4 HIST2H4A;



























H4C12 H4/D H4FD HIST1H4K; H4C13 H4/K H4FK HIST1H4L; H4C14 H4/N H4F2 H4FN HIST2H4 HIST2H4A;





















H4C15 H4/O H4FO HIST2H4B; H4-16 HIST4H4



























H4C15 H4/O H4FO HIST2H4B; H4-16 HIST4H4
