# Supplementary figures and images for: Antibody profiling of patients with prostate cancer reveals differences in antibody signatures among disease stages
Source: PubMed Central journal article supplement — J Immunother Cancer. 2020 Dec 16;8(2):e001510. doi: 10.1136/jitc-2020-001510 (PMC7745697; doi:10.1136/jitc-2020-001510), 2020-12-16

## Supplemental Figure 1

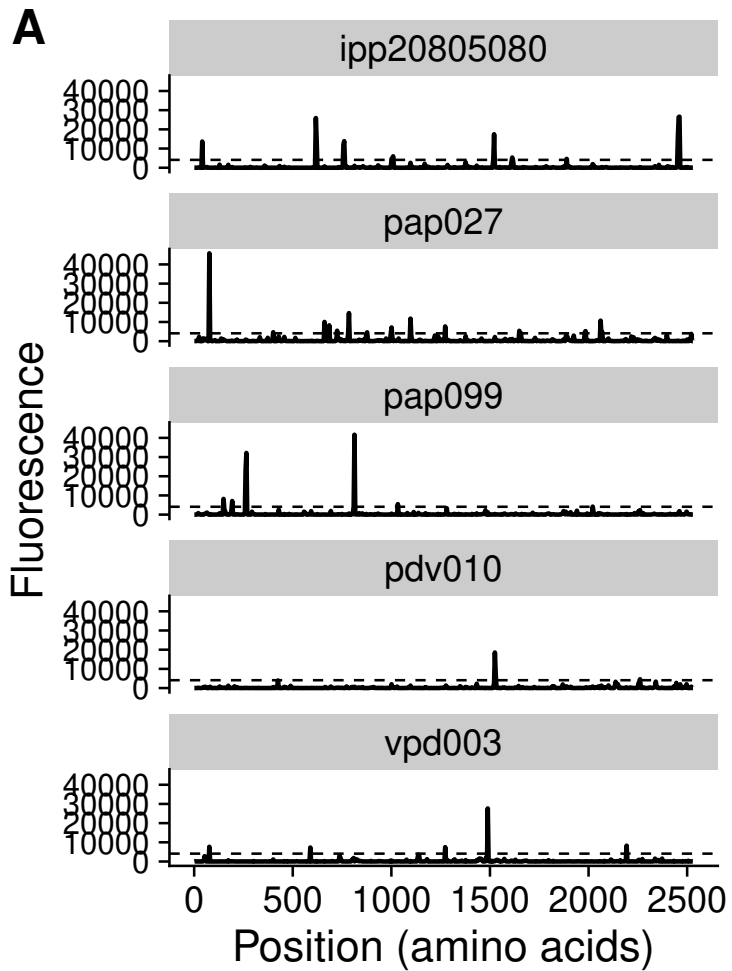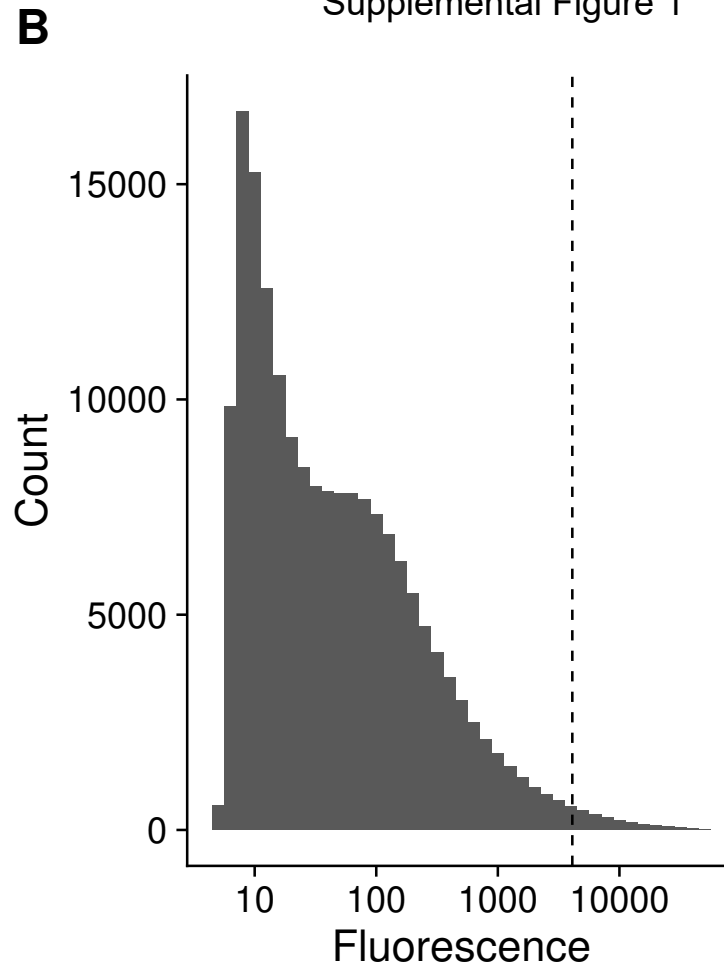

Supplement: jitc-2020-001510supp003.pdf [file jitc-2020-001510supp003.pdf]
